# Supplementary material for: Complementary Critical Functions of Zfy1 and Zfy2 in Mouse Spermatogenesis and Reproduction
Source: PubMed Central journal article supplement (PMC5287576; doi:10.1371/journal.pgen.1006578), 2017-01-23
Supplement: pgen.1006578.s006.pdf [file pgen.1006578.s006.pdf]

Supplementary Table 1 Putative off-target sites of gRNA.

|             | chromosome | position | strand | sequence                | mismatches |
|-------------|------------|----------|--------|-------------------------|------------|
| <i>Zfy1</i> | chrY       | 75092    | -      | GAAGCAGTCTTAGATTCCAGTGG | 0          |
| <i>Zfy2</i> | chrY       | 1377284  | -      | GAAGCAGTCTTAGATTCCAGTGG | 0          |
| OT-1        | chr2       | 8963046  | +      | GAAGCAGTCTTACATTCCAGTAG | 1          |
| OT-2        | chr9       | 96980720 | +      | GAAGCAGTCTTACATTCCAGTAG | 1          |
| OT-3        | chrX       | 98614155 | +      | GGGCAGTCTGAGATTCCAGCAG  | 3          |

OT, off-target site. PAM sequences are shown in red. Mismatches are shown in blue
