# Supplementary material for: Complementary Critical Functions of Zfy1 and Zfy2 in Mouse Spermatogenesis and Reproduction
Source: PLoS Genet. 2017 Jan 23;13(1):e1006578. doi: 10.1371/journal.pgen.1006578 (PMC5287576; doi:10.1371/journal.pgen.1006578)
Supplement: S3 Table — (XLSX) [file pgen.1006578.s008.xlsx]

## Sheet: Sheet1
Supplementary Table 3 Enriched GO terms in microarray analysis
GO Term	P value
GO:0019953~sexual reproduction	0.000175
GO:0048232~male gamete generation	0.000408
GO:0007283~spermatogenesis	0.000408
GO:0006508~proteolysis	0.000956
GO:0030030~cell projection organization	0.00138941
GO:0007017~microtubule-based process	0.00178784
GO:0016998~cell wall macromolecule catabolic process	0.00220021
GO:0044036~cell wall macromolecule metabolic process	0.00220021
GO:0006913~nucleocytoplasmic transport	0.00249174
GO:0051169~nuclear transport	0.00290169
GO:0007276~gamete generation	0.00471257
GO:0009566~fertilization	0.004821
GO:0006796~phosphate metabolic process	0.0094856
GO:0006793~phosphorus metabolic process	0.0094856
