# Supplementary material for: Complementary Critical Functions of Zfy1 and Zfy2 in Mouse Spermatogenesis and Reproduction
Source: PLoS Genet. 2017 Jan 23;13(1):e1006578. doi: 10.1371/journal.pgen.1006578 (PMC5287576; doi:10.1371/journal.pgen.1006578)
Supplement: S6 Table — (XLSX) [file pgen.1006578.s011.xlsx]

## Sheet: 1
Supplementary Table 6 Downregulated proteins in Zfy1/2-DKO sperm
Accession	Description
2A5G_MOUSE	Serine/threonine-protein phosphatase 2A 56 kDa regulatory subunit gamma isoform OS=Mus musculus GN=Ppp2r5c PE=1 SV=2
2ABG_MOUSE	Serine/threonine-protein phosphatase 2A 55 kDa regulatory subunit B gamma isoform OS=Mus musculus GN=Ppp2r2c PE=1 SV=1
5HT2A_MOUSE	5-hydroxytryptamine receptor 2A OS=Mus musculus GN=Htr2a PE=1 SV=1
5NT3A_MOUSE	Cytosolic 5'-nucleotidase 3A OS=Mus musculus GN=Nt5c3a PE=1 SV=4
68MP_MOUSE	6.8 kDa mitochondrial proteolipid OS=Mus musculus GN=Mp68 PE=1 SV=1
A16L1_MOUSE	Autophagy-related protein 16-1 OS=Mus musculus GN=Atg16l1 PE=1 SV=1
A1AT_MUSSA	Alpha-1-antiproteinase OS=Mus saxicola GN=Serpina1 PE=2 SV=1
A2M_MOUSE	Alpha-2-macroglobulin OS=Mus musculus GN=A2m PE=1 SV=3
AAPK2_MOUSE	5'-AMP-activated protein kinase catalytic subunit alpha-2 OS=Mus musculus GN=Prkaa2 PE=1 SV=3
ABC8B_MOUSE	ATP-binding cassette sub-family A member 8-B OS=Mus musculus GN=Abca8b PE=1 SV=2
ABCE1_MOUSE	ATP-binding cassette sub-family E member 1 OS=Mus musculus GN=Abce1 PE=1 SV=1
ABCG3_MOUSE	ATP-binding cassette sub-family G member 3 OS=Mus musculus GN=Abcg3 PE=1 SV=2
ABEC3_MOUSE	DNA dC->dU-editing enzyme APOBEC-3 OS=Mus musculus GN=Apobec3 PE=1 SV=2
ABLM1_MOUSE	Actin-binding LIM protein 1 OS=Mus musculus GN=Ablim1 PE=1 SV=1
ABRA_MOUSE	Actin-binding Rho-activating protein OS=Mus musculus GN=Abra PE=1 SV=1
ABRAL_MOUSE	Costars family protein ABRACL OS=Mus musculus GN=Abracl PE=1 SV=1
ACBD7_MOUSE	Acyl-CoA-binding domain-containing protein 7 OS=Mus musculus GN=Acbd7 PE=3 SV=2
ACOT1_MOUSE	Acyl-coenzyme A thioesterase 1 OS=Mus musculus GN=Acot1 PE=1 SV=1
ACSF3_MOUSE	Acyl-CoA synthetase family member 3, mitochondrial OS=Mus musculus GN=Acsf3 PE=1 SV=2
ACSS3_MOUSE	Acyl-CoA synthetase short-chain family member 3, mitochondrial OS=Mus musculus GN=Acss3 PE=1 SV=2
ACTS_MOUSE	Actin, alpha skeletal muscle OS=Mus musculus GN=Acta1 PE=1 SV=1
ACYP2_MOUSE	Acylphosphatase-2 OS=Mus musculus GN=Acyp2 PE=1 SV=2
ADA12_MOUSE	Disintegrin and metalloproteinase domain-containing protein 12 OS=Mus musculus GN=Adam12 PE=1 SV=2
ADA33_MOUSE	Disintegrin and metalloproteinase domain-containing protein 33 OS=Mus musculus GN=Adam33 PE=1 SV=3
ADAD1_MOUSE	Adenosine deaminase domain-containing protein 1 OS=Mus musculus GN=Adad1 PE=1 SV=1
ADCYA_MOUSE	Adenylate cyclase type 10 OS=Mus musculus GN=Adcy10 PE=2 SV=2
ADDB_MOUSE	Beta-adducin OS=Mus musculus GN=Add2 PE=1 SV=4
ADM1A_MOUSE	Disintegrin and metalloproteinase domain-containing protein 1a OS=Mus musculus GN=Adam1a PE=2 SV=3
ADNP_MOUSE	Activity-dependent neuroprotector homeobox protein OS=Mus musculus GN=Adnp PE=1 SV=1
ADRO_MOUSE	NADPH:adrenodoxin oxidoreductase, mitochondrial OS=Mus musculus GN=Fdxr PE=1 SV=1
AF1L1_MOUSE	Actin filament-associated protein 1-like 1 OS=Mus musculus GN=Afap1l1 PE=1 SV=1
AF1Q_MOUSE	Protein AF1q OS=Mus musculus GN=Mllt11 PE=1 SV=1
AFF2_MOUSE	AF4/FMR2 family member 2 OS=Mus musculus GN=Aff2 PE=2 SV=2
AGRB3_MOUSE	Adhesion G protein-coupled receptor B3 OS=Mus musculus GN=Adgrb3 PE=1 SV=2
AGRE4_MOUSE	Adhesion G protein-coupled receptor E4 OS=Mus musculus GN=Adgre4 PE=1 SV=1
AIRE_MOUSE	Autoimmune regulator OS=Mus musculus GN=Aire PE=1 SV=1
AKAP5_MOUSE	A-kinase anchor protein 5 OS=Mus musculus GN=Akap5 PE=1 SV=2
AKIR2_MOUSE	Akirin-2 OS=Mus musculus GN=Akirin2 PE=1 SV=1
ALKB1_MOUSE	Alkylated DNA repair protein alkB homolog 1 OS=Mus musculus GN=Alkbh1 PE=1 SV=1
ALMS1_MOUSE	Alstrom syndrome protein 1 homolog OS=Mus musculus GN=Alms1 PE=1 SV=2
ALS2_MOUSE	Alsin OS=Mus musculus GN=Als2 PE=1 SV=3
ALX1_MOUSE	ALX homeobox protein 1 OS=Mus musculus GN=Alx1 PE=1 SV=1
ALX3_MOUSE	Homeobox protein aristaless-like 3 OS=Mus musculus GN=Alx3 PE=2 SV=1
AMD_MOUSE	Peptidyl-glycine alpha-amidating monooxygenase OS=Mus musculus GN=Pam PE=1 SV=2
AMOT_MOUSE	Angiomotin OS=Mus musculus GN=Amot PE=1 SV=3
AN13C_MOUSE	Ankyrin repeat domain-containing protein 13C OS=Mus musculus GN=Ankrd13c PE=1 SV=2
AN32C_MOUSE	Putative acidic leucine-rich nuclear phosphoprotein 32 family member C OS=Mus musculus GN=Anp32c PE=2 SV=3
ANKR2_MOUSE	Ankyrin repeat domain-containing protein 2 OS=Mus musculus GN=Ankrd2 PE=1 SV=3
ANLN_MOUSE	Actin-binding protein anillin OS=Mus musculus GN=Anln PE=1 SV=2
ANM3_MOUSE	Protein arginine N-methyltransferase 3 OS=Mus musculus GN=Prmt3 PE=1 SV=2
ANMY1_MOUSE	Ankyrin repeat and MYND domain-containing protein 1 OS=Mus musculus GN=Ankmy1 PE=1 SV=1
ANO4_MOUSE	Anoctamin-4 OS=Mus musculus GN=Ano4 PE=2 SV=2
ANO8_MOUSE	Anoctamin-8 OS=Mus musculus GN=Ano8 PE=1 SV=3
ANT3_MOUSE	Antithrombin-III OS=Mus musculus GN=Serpinc1 PE=1 SV=1
ANXA3_MOUSE	Annexin A3 OS=Mus musculus GN=Anxa3 PE=1 SV=4
AOC2_MOUSE	Retina-specific copper amine oxidase OS=Mus musculus GN=Aoc2 PE=2 SV=2
AOFB_MOUSE	Amine oxidase [flavin-containing] B OS=Mus musculus GN=Maob PE=1 SV=4
AOXB_MOUSE	Aldehyde oxidase 2 OS=Mus musculus GN=Aox2 PE=1 SV=2
AOXC_MOUSE	Aldehyde oxidase 3 OS=Mus musculus GN=Aox3 PE=1 SV=1
AP1M1_MOUSE	AP-1 complex subunit mu-1 OS=Mus musculus GN=Ap1m1 PE=1 SV=3
AP1S1_MOUSE	AP-1 complex subunit sigma-1A OS=Mus musculus GN=Ap1s1 PE=1 SV=1
AP3S1_MOUSE	AP-3 complex subunit sigma-1 OS=Mus musculus GN=Ap3s1 PE=1 SV=2
AP4E1_MOUSE	AP-4 complex subunit epsilon-1 OS=Mus musculus GN=Ap4e1 PE=1 SV=3
APT_MOUSE	Adenine phosphoribosyltransferase OS=Mus musculus GN=Aprt PE=1 SV=2
ARAF_MOUSE	Serine/threonine-protein kinase A-Raf OS=Mus musculus GN=Araf PE=1 SV=2
ARCH_MOUSE	Protein archease OS=Mus musculus GN=Zbtb8os PE=1 SV=2
ARGL1_MOUSE	Arginine and glutamate-rich protein 1 OS=Mus musculus GN=Arglu1 PE=1 SV=2
ARHG8_MOUSE	Neuroepithelial cell-transforming gene 1 protein OS=Mus musculus GN=Net1 PE=1 SV=2
ARHGA_MOUSE	Rho guanine nucleotide exchange factor 10 OS=Mus musculus GN=Arhgef10 PE=1 SV=2
ARHGC_MOUSE	Rho guanine nucleotide exchange factor 12 OS=Mus musculus GN=Arhgef12 PE=1 SV=2
ARI1_MOUSE	E3 ubiquitin-protein ligase ARIH1 OS=Mus musculus GN=Arih1 PE=1 SV=3
ARI5B_MOUSE	AT-rich interactive domain-containing protein 5B OS=Mus musculus GN=Arid5b PE=1 SV=3
ARIP4_MOUSE	Helicase ARIP4 OS=Mus musculus GN=Rad54l2 PE=1 SV=1
ARRD5_MOUSE	Arrestin domain-containing protein 5 OS=Mus musculus GN=Arrdc5 PE=2 SV=1
AS3MT_MOUSE	Arsenite methyltransferase OS=Mus musculus GN=As3mt PE=1 SV=2
ASCC3_MOUSE	Activating signal cointegrator 1 complex subunit 3 OS=Mus musculus GN=Ascc3 PE=1 SV=1
AT12A_MOUSE	Potassium-transporting ATPase alpha chain 2 OS=Mus musculus GN=Atp12a PE=1 SV=3
AT1A2_MOUSE	Sodium/potassium-transporting ATPase subunit alpha-2 OS=Mus musculus GN=Atp1a2 PE=1 SV=1
AT2B2_MOUSE	Plasma membrane calcium-transporting ATPase 2 OS=Mus musculus GN=Atp2b2 PE=1 SV=2
AT2L2_MOUSE	5-phosphohydroxy-L-lysine phospho-lyase OS=Mus musculus GN=Phykpl PE=1 SV=1
AT5G1_MOUSE	ATP synthase F(0) complex subunit C1, mitochondrial OS=Mus musculus GN=Atp5g1 PE=2 SV=1
ATAD1_MOUSE	ATPase family AAA domain-containing protein 1 OS=Mus musculus GN=Atad1 PE=1 SV=1
ATAD5_MOUSE	ATPase family AAA domain-containing protein 5 OS=Mus musculus GN=Atad5 PE=1 SV=1
ATG7_MOUSE	Ubiquitin-like modifier-activating enzyme ATG7 OS=Mus musculus GN=Atg7 PE=1 SV=1
ATP4A_MOUSE	Potassium-transporting ATPase alpha chain 1 OS=Mus musculus GN=Atp4a PE=1 SV=3
ATRN_MOUSE	Attractin OS=Mus musculus GN=Atrn PE=1 SV=3
ATS4_MOUSE	A disintegrin and metalloproteinase with thrombospondin motifs 4 OS=Mus musculus GN=Adamts4 PE=2 SV=2
ATX3_MOUSE	Ataxin-3 OS=Mus musculus GN=Atxn3 PE=1 SV=2
AZI2_MOUSE	5-azacytidine-induced protein 2 OS=Mus musculus GN=Azi2 PE=1 SV=1
B3GA2_MOUSE	Galactosylgalactosylxylosylprotein 3-beta-glucuronosyltransferase 2 OS=Mus musculus GN=B3gat2 PE=2 SV=1
B4GN4_MOUSE	N-acetyl-beta-glucosaminyl-glycoprotein 4-beta-N-acetylgalactosaminyltransferase 1 OS=Mus musculus GN=B4galnt4 PE=2 SV=1
BACH2_MOUSE	Transcription regulator protein BACH2 OS=Mus musculus GN=Bach2 PE=1 SV=3
BAG3_MOUSE	BAG family molecular chaperone regulator 3 OS=Mus musculus GN=Bag3 PE=1 SV=2
BAHC1_MOUSE	BAH and coiled-coil domain-containing protein 1 OS=Mus musculus GN=Bahcc1 PE=2 SV=2
BAKOR_MOUSE	Beclin 1-associated autophagy-related key regulator OS=Mus musculus GN=Atg14 PE=1 SV=1
BARD1_MOUSE	BRCA1-associated RING domain protein 1 OS=Mus musculus GN=Bard1 PE=2 SV=1
BAZ1A_MOUSE	Bromodomain adjacent to zinc finger domain protein 1A OS=Mus musculus GN=Baz1a PE=1 SV=3
BBOF1_MOUSE	Basal body-orientation factor 1 OS=Mus musculus GN=Ccdc176 PE=2 SV=2
BBS12_MOUSE	Bardet-Biedl syndrome 12 protein homolog OS=Mus musculus GN=Bbs12 PE=3 SV=2
BCD1_MOUSE	Box C/D snoRNA protein 1 OS=Mus musculus GN=Znhit6 PE=1 SV=2
BCL6_MOUSE	B-cell lymphoma 6 protein homolog OS=Mus musculus GN=Bcl6 PE=1 SV=1
BCOR_MOUSE	BCL-6 corepressor OS=Mus musculus GN=Bcor PE=1 SV=2
BEST1_MOUSE	Bestrophin-1 OS=Mus musculus GN=Best1 PE=2 SV=3
BEST3_MOUSE	Bestrophin-3 OS=Mus musculus GN=Best3 PE=2 SV=1
BI2L2_MOUSE	Brain-specific angiogenesis inhibitor 1-associated protein 2-like protein 2 OS=Mus musculus GN=Baiap2l2 PE=1 SV=1
BICD2_MOUSE	Protein bicaudal D homolog 2 OS=Mus musculus GN=Bicd2 PE=1 SV=1
BICR1_MOUSE	Bicaudal D-related protein 1 OS=Mus musculus GN=Ccdc64 PE=1 SV=1
BID_MOUSE	BH3-interacting domain death agonist OS=Mus musculus GN=Bid PE=1 SV=2
BIEA_MOUSE	Biliverdin reductase A OS=Mus musculus GN=Blvra PE=1 SV=1
BLNK_MOUSE	B-cell linker protein OS=Mus musculus GN=Blnk PE=1 SV=1
BMP3_MOUSE	Bone morphogenetic protein 3 OS=Mus musculus GN=Bmp3 PE=1 SV=1
BPIA3_MOUSE	BPI fold-containing family A member 3 OS=Mus musculus GN=Bpifa3 PE=2 SV=1
BRD3_MOUSE	Bromodomain-containing protein 3 OS=Mus musculus GN=Brd3 PE=1 SV=2
BRE1B_MOUSE	E3 ubiquitin-protein ligase BRE1B OS=Mus musculus GN=Rnf40 PE=1 SV=2
BRF2_MOUSE	Transcription factor IIIB 50 kDa subunit OS=Mus musculus GN=Brf2 PE=1 SV=1
BT2A2_MOUSE	Butyrophilin subfamily 2 member A2 OS=Mus musculus GN=Btn2a2 PE=1 SV=1
C170B_MOUSE	Centrosomal protein of 170 kDa protein B OS=Mus musculus GN=Cep170b PE=1 SV=2
C1QT9_MOUSE	Complement C1q and tumor necrosis factor-related protein 9 OS=Mus musculus GN=C1qtnf9 PE=1 SV=1
C2C2L_MOUSE	C2 domain-containing protein 2-like OS=Mus musculus GN=C2cd2l PE=1 SV=3
C2CD5_MOUSE	C2 domain-containing protein 5 OS=Mus musculus GN=C2cd5 PE=1 SV=2
CA052_MOUSE	UPF0690 protein C1orf52 homolog OS=Mus musculus PE=1 SV=1
CA2D1_MOUSE	Voltage-dependent calcium channel subunit alpha-2/delta-1 OS=Mus musculus GN=Cacna2d1 PE=1 SV=1
CA2D3_MOUSE	Voltage-dependent calcium channel subunit alpha-2/delta-3 OS=Mus musculus GN=Cacna2d3 PE=1 SV=1
CAC1A_MOUSE	Voltage-dependent P/Q-type calcium channel subunit alpha-1A OS=Mus musculus GN=Cacna1a PE=1 SV=2
CAC1C_MOUSE	Voltage-dependent L-type calcium channel subunit alpha-1C OS=Mus musculus GN=Cacna1c PE=1 SV=1
CAC1E_MOUSE	Voltage-dependent R-type calcium channel subunit alpha-1E OS=Mus musculus GN=Cacna1e PE=1 SV=1
CAF1B_MOUSE	Chromatin assembly factor 1 subunit B OS=Mus musculus GN=Chaf1b PE=1 SV=1
CAGE1_MOUSE	Cancer-associated gene 1 protein homolog OS=Mus musculus GN=Cage1 PE=1 SV=2
CAN7_MOUSE	Calpain-7 OS=Mus musculus GN=Capn7 PE=2 SV=1
CANB1_MOUSE	Calcineurin subunit B type 1 OS=Mus musculus GN=Ppp3r1 PE=1 SV=3
CAP2_MOUSE	Adenylyl cyclase-associated protein 2 OS=Mus musculus GN=Cap2 PE=1 SV=1
CASR_MOUSE	Extracellular calcium-sensing receptor OS=Mus musculus GN=Casr PE=1 SV=2
CAYP2_MOUSE	Calcyphosin-2 OS=Mus musculus GN=Caps2 PE=2 SV=2
CB071_MOUSE	Uncharacterized protein C2orf71 homolog OS=Mus musculus PE=2 SV=1
CB074_MOUSE	Uncharacterized protein C2orf74 homolog OS=Mus musculus PE=2 SV=1
CBG_MOUSE	Corticosteroid-binding globulin OS=Mus musculus GN=Serpina6 PE=1 SV=1
CBPC4_MOUSE	Cytosolic carboxypeptidase 4 OS=Mus musculus GN=Agbl1 PE=1 SV=2
CBPC6_MOUSE	Cytosolic carboxypeptidase 6 OS=Mus musculus GN=Agbl4 PE=1 SV=1
CBWD1_MOUSE	COBW domain-containing protein 1 OS=Mus musculus GN=Cbwd1 PE=1 SV=1
CC020_MOUSE	Uncharacterized protein C3orf20 homolog OS=Mus musculus PE=2 SV=1
CC150_MOUSE	Coiled-coil domain-containing protein 150 OS=Mus musculus GN=Ccdc150 PE=2 SV=2
CC175_MOUSE	Coiled-coil domain-containing protein 175 OS=Mus musculus GN=Ccdc175 PE=4 SV=1
CCD38_MOUSE	Coiled-coil domain-containing protein 38 OS=Mus musculus GN=Ccdc38 PE=2 SV=1
CCD51_MOUSE	Coiled-coil domain-containing protein 51 OS=Mus musculus GN=Ccdc51 PE=1 SV=1
CCDC7_MOUSE	Coiled-coil domain-containing protein 7 OS=Mus musculus GN=Ccdc7 PE=2 SV=1
CCM2L_MOUSE	Cerebral cavernous malformations 2 protein-like OS=Mus musculus GN=Ccm2l PE=2 SV=2
CCNA2_MOUSE	Cyclin-A2 OS=Mus musculus GN=Ccna2 PE=1 SV=2
CCNB2_MOUSE	G2/mitotic-specific cyclin-B2 OS=Mus musculus GN=Ccnb2 PE=1 SV=2
CCNO_MOUSE	Cyclin-O OS=Mus musculus GN=Ccno PE=1 SV=1
CCR4_MOUSE	C-C chemokine receptor type 4 OS=Mus musculus GN=Ccr4 PE=2 SV=2
CD37_MOUSE	Leukocyte antigen CD37 OS=Mus musculus GN=Cd37 PE=1 SV=1
CD3Z_MOUSE	T-cell surface glycoprotein CD3 zeta chain OS=Mus musculus GN=Cd247 PE=1 SV=1
CD59B_MOUSE	CD59B glycoprotein OS=Mus musculus GN=Cd59b PE=2 SV=2
CD80_MOUSE	T-lymphocyte activation antigen CD80 OS=Mus musculus GN=Cd80 PE=1 SV=1
CD81_MOUSE	CD81 antigen OS=Mus musculus GN=Cd81 PE=1 SV=2
CDKL1_MOUSE	Cyclin-dependent kinase-like 1 OS=Mus musculus GN=Cdkl1 PE=2 SV=1
CDKL2_MOUSE	Cyclin-dependent kinase-like 2 OS=Mus musculus GN=Cdkl2 PE=2 SV=1
CDKL5_MOUSE	Cyclin-dependent kinase-like 5 OS=Mus musculus GN=Cdkl5 PE=1 SV=1
CDKN3_MOUSE	Cyclin-dependent kinase inhibitor 3 OS=Mus musculus GN=Cdkn3 PE=2 SV=1
CE112_MOUSE	Centrosomal protein of 112 kDa OS=Mus musculus GN=Cep112 PE=2 SV=2
CE162_MOUSE	Centrosomal protein of 162 kDa OS=Mus musculus GN=Cep162 PE=1 SV=2
CE295_MOUSE	Centrosomal protein of 295 kDa OS=Mus musculus GN=Cep295 PE=1 SV=3
CEGT_MOUSE	Ceramide glucosyltransferase OS=Mus musculus GN=Ugcg PE=1 SV=1
CELR3_MOUSE	Cadherin EGF LAG seven-pass G-type receptor 3 OS=Mus musculus GN=Celsr3 PE=2 SV=2
CENPC_MOUSE	Centromere protein C OS=Mus musculus GN=Cenpc PE=1 SV=2
CENPN_MOUSE	Centromere protein N OS=Mus musculus GN=Cenpn PE=2 SV=1
CETN2_MOUSE	Centrin-2 OS=Mus musculus GN=Cetn2 PE=1 SV=1
CF047_MOUSE	Uncharacterized protein C6orf47 homolog OS=Mus musculus GN=D17h6s53e PE=1 SV=1
CFA74_MOUSE	Cilia- and flagella-associated protein 74 OS=Mus musculus GN=Cfap74 PE=2 SV=3
CFTR_MOUSE	Cystic fibrosis transmembrane conductance regulator OS=Mus musculus GN=Cftr PE=1 SV=2
CG072_MOUSE	Uncharacterized protein C7orf72 homolog OS=Mus musculus PE=2 SV=2
CH004_MOUSE	Protein C8orf4 homolog OS=Mus musculus PE=1 SV=1
CH048_MOUSE	Uncharacterized protein C8orf48 homolog OS=Mus musculus PE=2 SV=1
CHIT1_MOUSE	Chitotriosidase-1 OS=Mus musculus GN=Chit1 PE=1 SV=2
CHKA_MOUSE	Choline kinase alpha OS=Mus musculus GN=Chka PE=1 SV=3
CHKB_MOUSE	Choline/ethanolamine kinase OS=Mus musculus GN=Chkb PE=1 SV=3
CHM4B_MOUSE	Charged multivesicular body protein 4b OS=Mus musculus GN=Chmp4b PE=1 SV=2
CHSP1_MOUSE	Calcium-regulated heat stable protein 1 OS=Mus musculus GN=Carhsp1 PE=1 SV=1
CHSS3_MOUSE	Chondroitin sulfate synthase 3 OS=Mus musculus GN=Chsy3 PE=2 SV=3
CI131_MOUSE	Uncharacterized protein C9orf131 homolog OS=Mus musculus PE=2 SV=1
CIB4_MOUSE	Calcium and integrin-binding family member 4 OS=Mus musculus GN=Cib4 PE=2 SV=1
CJ107_MOUSE	Uncharacterized protein C10orf107 homolog OS=Mus musculus PE=2 SV=2
CK054_MOUSE	Ester hydrolase C11orf54 homolog OS=Mus musculus PE=1 SV=1
CKLF_MOUSE	Chemokine-like factor OS=Mus musculus GN=Cklf PE=2 SV=1
CKLF6_MOUSE	CKLF-like MARVEL transmembrane domain-containing protein 6 OS=Mus musculus GN=Cmtm6 PE=1 SV=1
CKP2L_MOUSE	Cytoskeleton-associated protein 2-like OS=Mus musculus GN=Ckap2l PE=1 SV=1
CL066_MOUSE	UPF0536 protein C12orf66 homolog OS=Mus musculus PE=1 SV=1
CLC11_MOUSE	C-type lectin domain family 11 member A OS=Mus musculus GN=Clec11a PE=2 SV=1
CLC14_MOUSE	C-type lectin domain family 14 member A OS=Mus musculus GN=Clec14a PE=1 SV=2
CLC2F_MOUSE	C-type lectin domain family 2 member F OS=Mus musculus GN=Clec2f PE=3 SV=1
CLD11_MOUSE	Claudin-11 OS=Mus musculus GN=Cldn11 PE=1 SV=1
CMPK2_MOUSE	UMP-CMP kinase 2, mitochondrial OS=Mus musculus GN=Cmpk2 PE=1 SV=2
CMYA5_MOUSE	Cardiomyopathy-associated protein 5 OS=Mus musculus GN=Cmya5 PE=1 SV=2
CNDD3_MOUSE	Condensin-2 complex subunit D3 OS=Mus musculus GN=Ncapd3 PE=1 SV=3
CNNM4_MOUSE	Metal transporter CNNM4 OS=Mus musculus GN=Cnnm4 PE=1 SV=2
CNTN2_MOUSE	Contactin-2 OS=Mus musculus GN=Cntn2 PE=1 SV=2
CNTP4_MOUSE	Contactin-associated protein-like 4 OS=Mus musculus GN=Cntnap4 PE=1 SV=2
CO052_MOUSE	Uncharacterized protein C15orf52 homolog OS=Mus musculus PE=1 SV=1
CO1A2_MOUSE	Collagen alpha-2(I) chain OS=Mus musculus GN=Col1a2 PE=1 SV=2
CO2A1_MOUSE	Collagen alpha-1(II) chain OS=Mus musculus GN=Col2a1 PE=1 SV=2
CO3A1_MOUSE	Collagen alpha-1(III) chain OS=Mus musculus GN=Col3a1 PE=1 SV=4
CO4A4_MOUSE	Collagen alpha-4(IV) chain OS=Mus musculus GN=Col4a4 PE=2 SV=1
CO5A1_MOUSE	Collagen alpha-1(V) chain OS=Mus musculus GN=Col5a1 PE=1 SV=2
CO6A4_MOUSE	Collagen alpha-4(VI) chain OS=Mus musculus GN=Col6a4 PE=1 SV=2
CO6A6_MOUSE	Collagen alpha-6(VI) chain OS=Mus musculus GN=Col6a6 PE=1 SV=2
COAA1_MOUSE	Collagen alpha-1(X) chain OS=Mus musculus GN=Col10a1 PE=2 SV=1
COG3_MOUSE	Conserved oligomeric Golgi complex subunit 3 OS=Mus musculus GN=Cog3 PE=1 SV=3
COHA1_MOUSE	Collagen alpha-1(XVII) chain OS=Mus musculus GN=Col17a1 PE=1 SV=3
COMD3_MOUSE	COMM domain-containing protein 3 OS=Mus musculus GN=Commd3 PE=1 SV=1
COMD5_MOUSE	COMM domain-containing protein 5 OS=Mus musculus GN=Commd5 PE=1 SV=1
COQ5_MOUSE	2-methoxy-6-polyprenyl-1,4-benzoquinol methylase, mitochondrial OS=Mus musculus GN=Coq5 PE=1 SV=2
COR2B_MOUSE	Coronin-2B OS=Mus musculus GN=Coro2b PE=1 SV=2
COSA1_MOUSE	Collagen alpha-1(XXVIII) chain OS=Mus musculus GN=Col28a1 PE=2 SV=1
CP26A_MOUSE	Cytochrome P450 26A1 OS=Mus musculus GN=Cyp26a1 PE=2 SV=1
CP46A_MOUSE	Cholesterol 24-hydroxylase OS=Mus musculus GN=Cyp46a1 PE=1 SV=1
CPVL_MOUSE	Probable serine carboxypeptidase CPVL OS=Mus musculus GN=Cpvl PE=2 SV=2
CQ064_MOUSE	Uncharacterized protein C17orf64 homolog OS=Mus musculus PE=2 SV=3
CREG1_MOUSE	Protein CREG1 OS=Mus musculus GN=Creg1 PE=1 SV=1
CRIPT_MOUSE	Cysteine-rich PDZ-binding protein OS=Mus musculus GN=Cript PE=1 SV=1
CRK_MOUSE	Adapter molecule crk OS=Mus musculus GN=Crk PE=1 SV=1
CRY1_MOUSE	Cryptochrome-1 OS=Mus musculus GN=Cry1 PE=1 SV=1
CSN1_MOUSE	COP9 signalosome complex subunit 1 OS=Mus musculus GN=Gps1 PE=1 SV=1
CSN3_MOUSE	COP9 signalosome complex subunit 3 OS=Mus musculus GN=Cops3 PE=1 SV=3
CST11_MOUSE	Cystatin-11 OS=Mus musculus GN=Cst11 PE=2 SV=1
CST12_MOUSE	Cystatin-12 OS=Mus musculus GN=Cst12 PE=1 SV=1
CST8_MOUSE	Cystatin-8 OS=Mus musculus GN=Cst8 PE=1 SV=2
CT027_MOUSE	UPF0687 protein C20orf27 homolog OS=Mus musculus PE=1 SV=3
CT194_MOUSE	Uncharacterized protein C20orf194 homolog OS=Mus musculus PE=1 SV=2
CTDP1_MOUSE	RNA polymerase II subunit A C-terminal domain phosphatase OS=Mus musculus GN=Ctdp1 PE=1 SV=1
CTR3_MOUSE	Cationic amino acid transporter 3 OS=Mus musculus GN=Slc7a3 PE=2 SV=1
CTR9_MOUSE	RNA polymerase-associated protein CTR9 homolog OS=Mus musculus GN=Ctr9 PE=1 SV=2
CTSR3_MOUSE	Cation channel sperm-associated protein 3 OS=Mus musculus GN=Catsper3 PE=1 SV=2
CUL4A_MOUSE	Cullin-4A OS=Mus musculus GN=Cul4a PE=1 SV=1
CUL7_MOUSE	Cullin-7 OS=Mus musculus GN=Cul7 PE=1 SV=2
CX056_MOUSE	UPF0428 protein CXorf56 homolog OS=Mus musculus PE=1 SV=1
CXA8_MOUSE	Gap junction alpha-8 protein OS=Mus musculus GN=Gja8 PE=1 SV=2
CYFP2_MOUSE	Cytoplasmic FMR1-interacting protein 2 OS=Mus musculus GN=Cyfip2 PE=1 SV=2
CYGB_MOUSE	Cytoglobin OS=Mus musculus GN=Cygb PE=1 SV=1
DAAM1_MOUSE	Disheveled-associated activator of morphogenesis 1 OS=Mus musculus GN=Daam1 PE=1 SV=4
DAB2_MOUSE	Disabled homolog 2 OS=Mus musculus GN=Dab2 PE=1 SV=2
DAF2_MOUSE	Complement decay-accelerating factor transmembrane isoform OS=Mus musculus GN=Cd55b PE=2 SV=2
DAG1_MOUSE	Dystroglycan OS=Mus musculus GN=Dag1 PE=1 SV=4
DAPLE_MOUSE	Protein Daple OS=Mus musculus GN=Ccdc88c PE=1 SV=1
DAXX_MOUSE	Death domain-associated protein 6 OS=Mus musculus GN=Daxx PE=1 SV=1
DC1L2_MOUSE	Cytoplasmic dynein 1 light intermediate chain 2 OS=Mus musculus GN=Dync1li2 PE=1 SV=2
DCA17_MOUSE	DDB1- and CUL4-associated factor 17 OS=Mus musculus GN=Dcaf17 PE=2 SV=1
DCAF6_MOUSE	DDB1- and CUL4-associated factor 6 OS=Mus musculus GN=Dcaf6 PE=1 SV=1
DCD2C_MOUSE	Doublecortin domain-containing protein 2C OS=Mus musculus GN=Dcdc2c PE=2 SV=2
DCTN3_MOUSE	Dynactin subunit 3 OS=Mus musculus GN=Dctn3 PE=1 SV=2
DD19A_MOUSE	ATP-dependent RNA helicase DDX19A OS=Mus musculus GN=Ddx19a PE=1 SV=2
DDX11_MOUSE	Probable ATP-dependent RNA helicase DDX11 OS=Mus musculus GN=Ddx11 PE=1 SV=1
DDX4_MOUSE	Probable ATP-dependent RNA helicase DDX4 OS=Mus musculus GN=Ddx4 PE=1 SV=2
DDX41_MOUSE	Probable ATP-dependent RNA helicase DDX41 OS=Mus musculus GN=Ddx41 PE=1 SV=2
DDX47_MOUSE	Probable ATP-dependent RNA helicase DDX47 OS=Mus musculus GN=Ddx47 PE=2 SV=2
DDX49_MOUSE	Probable ATP-dependent RNA helicase DDX49 OS=Mus musculus GN=Ddx49 PE=2 SV=1
DDX59_MOUSE	Probable ATP-dependent RNA helicase DDX59 OS=Mus musculus GN=Ddx59 PE=1 SV=1
DEN2C_MOUSE	DENN domain-containing protein 2C OS=Mus musculus GN=Dennd2c PE=1 SV=1
DFFB_MOUSE	DNA fragmentation factor subunit beta OS=Mus musculus GN=Dffb PE=1 SV=1
DHSD_MOUSE	Succinate dehydrogenase [ubiquinone] cytochrome b small subunit, mitochondrial OS=Mus musculus GN=Sdhd PE=1 SV=2
DHX40_MOUSE	Probable ATP-dependent RNA helicase DHX40 OS=Mus musculus GN=Dhx40 PE=1 SV=1
DHX57_MOUSE	Putative ATP-dependent RNA helicase DHX57 OS=Mus musculus GN=Dhx57 PE=1 SV=2
DIA1R_MOUSE	Deleted in autism-related protein 1 homolog OS=Mus musculus PE=2 SV=1
DIAP1_MOUSE	Protein diaphanous homolog 1 OS=Mus musculus GN=Diaph1 PE=1 SV=1
DISC1_MOUSE	Disrupted in schizophrenia 1 homolog OS=Mus musculus GN=Disc1 PE=1 SV=2
DJC14_MOUSE	DnaJ homolog subfamily C member 14 OS=Mus musculus GN=Dnajc14 PE=2 SV=2
DLEC1_MOUSE	Deleted in lung and esophageal cancer protein 1 homolog OS=Mus musculus GN=Dlec1 PE=2 SV=1
DLGP4_MOUSE	Disks large-associated protein 4 OS=Mus musculus GN=Dlgap4 PE=1 SV=1
DMXL1_MOUSE	DmX-like protein 1 OS=Mus musculus GN=Dmxl1 PE=1 SV=1
DMXL2_MOUSE	DmX-like protein 2 OS=Mus musculus GN=Dmxl2 PE=1 SV=3
DNAL1_MOUSE	Dynein light chain 1, axonemal OS=Mus musculus GN=Dnal1 PE=1 SV=2
DNAL4_MOUSE	Dynein light chain 4, axonemal OS=Mus musculus GN=Dnal4 PE=3 SV=2
DND1_MOUSE	Dead end protein homolog 1 OS=Mus musculus GN=Dnd1 PE=1 SV=1
DNLI1_MOUSE	DNA ligase 1 OS=Mus musculus GN=Lig1 PE=1 SV=2
DNMT1_MOUSE	DNA (cytosine-5)-methyltransferase 1 OS=Mus musculus GN=Dnmt1 PE=1 SV=5
DNPH1_MOUSE	2'-deoxynucleoside 5'-phosphate N-hydrolase 1 OS=Mus musculus GN=Dnph1 PE=1 SV=2
DNSL1_MOUSE	Deoxyribonuclease-1-like 1 OS=Mus musculus GN=Dnase1l1 PE=2 SV=3
DNSL2_MOUSE	Deoxyribonuclease-1-like 2 OS=Mus musculus GN=Dnase1l2 PE=2 SV=1
DOCK2_MOUSE	Dedicator of cytokinesis protein 2 OS=Mus musculus GN=Dock2 PE=1 SV=3
DOCK8_MOUSE	Dedicator of cytokinesis protein 8 OS=Mus musculus GN=Dock8 PE=1 SV=4
DPM3_MOUSE	Dolichol-phosphate mannosyltransferase subunit 3 OS=Mus musculus GN=Dpm3 PE=1 SV=1
DPOE4_MOUSE	DNA polymerase epsilon subunit 4 OS=Mus musculus GN=Pole4 PE=1 SV=1
DPOG1_MOUSE	DNA polymerase subunit gamma-1 OS=Mus musculus GN=Polg PE=1 SV=3
DPS1_MOUSE	Decaprenyl-diphosphate synthase subunit 1 OS=Mus musculus GN=Pdss1 PE=1 SV=1
DRC7_MOUSE	Dynein regulatory complex subunit 7 OS=Mus musculus GN=Drc7 PE=1 SV=4
DSG1B_MOUSE	Desmoglein-1-beta OS=Mus musculus GN=Dsg1b PE=1 SV=1
DTNA_MOUSE	Dystrobrevin alpha OS=Mus musculus GN=Dtna PE=1 SV=2
DUS15_MOUSE	Dual specificity protein phosphatase 15 OS=Mus musculus GN=Dusp15 PE=2 SV=3
DUS8_MOUSE	Dual specificity protein phosphatase 8 OS=Mus musculus GN=Dusp8 PE=2 SV=1
DYH12_MOUSE	Dynein heavy chain 12, axonemal OS=Mus musculus GN=Dnah12 PE=1 SV=2
DYL2_MOUSE	Dynein light chain 2, cytoplasmic OS=Mus musculus GN=Dynll2 PE=1 SV=1
DYST_MOUSE	Dystonin OS=Mus musculus GN=Dst PE=1 SV=2
DZAN1_MOUSE	Double zinc ribbon and ankyrin repeat-containing protein 1 OS=Mus musculus GN=Dzank1 PE=1 SV=2
E2F2_MOUSE	Transcription factor E2F2 OS=Mus musculus GN=E2f2 PE=1 SV=2
ECHD1_MOUSE	Ethylmalonyl-CoA decarboxylase OS=Mus musculus GN=Echdc1 PE=1 SV=2
ECM2_MOUSE	Extracellular matrix protein 2 OS=Mus musculus GN=Ecm2 PE=1 SV=1
ECT2_MOUSE	Protein ECT2 OS=Mus musculus GN=Ect2 PE=1 SV=2
EDRF1_MOUSE	Erythroid differentiation-related factor 1 OS=Mus musculus GN=Edrf1 PE=1 SV=1
EFCB6_MOUSE	EF-hand calcium-binding domain-containing protein 6 OS=Mus musculus GN=Efcab6 PE=1 SV=2
EFHB_MOUSE	EF-hand domain-containing family member B OS=Mus musculus GN=Efhb PE=1 SV=2
EGR2_MOUSE	E3 SUMO-protein ligase EGR2 OS=Mus musculus GN=Egr2 PE=1 SV=3
EHD2_MOUSE	EH domain-containing protein 2 OS=Mus musculus GN=Ehd2 PE=1 SV=1
EHD3_MOUSE	EH domain-containing protein 3 OS=Mus musculus GN=Ehd3 PE=1 SV=2
EI2BA_MOUSE	Translation initiation factor eIF-2B subunit alpha OS=Mus musculus GN=Eif2b1 PE=1 SV=1
EIF1_MOUSE	Eukaryotic translation initiation factor 1 OS=Mus musculus GN=Eif1 PE=1 SV=2
ELAV3_MOUSE	ELAV-like protein 3 OS=Mus musculus GN=Elavl3 PE=1 SV=1
ELF1_MOUSE	ETS-related transcription factor Elf-1 OS=Mus musculus GN=Elf1 PE=1 SV=1
ELMD3_MOUSE	ELMO domain-containing protein 3 OS=Mus musculus GN=Elmod3 PE=1 SV=1
EMX1_MOUSE	Homeobox protein EMX1 OS=Mus musculus GN=Emx1 PE=2 SV=2
ENKD1_MOUSE	Enkurin domain-containing protein 1 OS=Mus musculus GN=Enkd1 PE=1 SV=1
ENPP2_MOUSE	Ectonucleotide pyrophosphatase/phosphodiesterase family member 2 OS=Mus musculus GN=Enpp2 PE=1 SV=3
EPB42_MOUSE	Erythrocyte membrane protein band 4.2 OS=Mus musculus GN=Epb42 PE=1 SV=3
EPHA1_MOUSE	Ephrin type-A receptor 1 OS=Mus musculus GN=Epha1 PE=1 SV=2
EPHB3_MOUSE	Ephrin type-B receptor 3 OS=Mus musculus GN=Ephb3 PE=1 SV=2
EPHB4_MOUSE	Ephrin type-B receptor 4 OS=Mus musculus GN=Ephb4 PE=1 SV=2
EPYC_MOUSE	Epiphycan OS=Mus musculus GN=Epyc PE=2 SV=1
ERC2_MOUSE	ERC protein 2 OS=Mus musculus GN=Erc2 PE=1 SV=2
ERC6L_MOUSE	DNA excision repair protein ERCC-6-like OS=Mus musculus GN=Ercc6l PE=1 SV=1
ERF1_MOUSE	Eukaryotic peptide chain release factor subunit 1 OS=Mus musculus GN=Etf1 PE=1 SV=4
ERI1_MOUSE	3'-5' exoribonuclease 1 OS=Mus musculus GN=Eri1 PE=1 SV=2
ERLN1_MOUSE	Erlin-1 OS=Mus musculus GN=Erlin1 PE=1 SV=1
ERR2_MOUSE	Steroid hormone receptor ERR2 OS=Mus musculus GN=Esrrb PE=1 SV=2
EST4A_MOUSE	Carboxylesterase 4A OS=Mus musculus GN=Ces4a PE=2 SV=2
ETV6_MOUSE	Transcription factor ETV6 OS=Mus musculus GN=Etv6 PE=1 SV=1
EXOC1_MOUSE	Exocyst complex component 1 OS=Mus musculus GN=Exoc1 PE=1 SV=4
EXOC2_MOUSE	Exocyst complex component 2 OS=Mus musculus GN=Exoc2 PE=1 SV=1
EXOC7_MOUSE	Exocyst complex component 7 OS=Mus musculus GN=Exoc7 PE=1 SV=2
F102B_MOUSE	Protein FAM102B OS=Mus musculus GN=Fam102b PE=2 SV=2
F110A_MOUSE	Protein FAM110A OS=Mus musculus GN=Fam110a PE=2 SV=2
F120A_MOUSE	Constitutive coactivator of PPAR-gamma-like protein 1 OS=Mus musculus GN=FAM120A PE=1 SV=2
F149B_MOUSE	Protein FAM149B1 OS=Mus musculus GN=Fam149b1 PE=2 SV=1
F16A2_MOUSE	FTS and Hook-interacting protein OS=Mus musculus GN=Fam160a2 PE=1 SV=2
F184B_MOUSE	Protein FAM184B OS=Mus musculus GN=Fam184b PE=2 SV=1
F188A_MOUSE	Protein FAM188A OS=Mus musculus GN=Fam188a PE=1 SV=2
F1892_MOUSE	Protein FAM189A2 OS=Mus musculus GN=Fam189a2 PE=2 SV=2
F193A_MOUSE	Protein FAM193A OS=Mus musculus GN=Fam193a PE=1 SV=2
F198A_MOUSE	Protein FAM198A OS=Mus musculus GN=Fam198a PE=2 SV=1
F205A_MOUSE	Protein FAM205A OS=Mus musculus GN=Fam205a PE=3 SV=1
F212B_MOUSE	Protein FAM212B OS=Mus musculus GN=Fam212b PE=2 SV=1
F221B_MOUSE	Protein FAM221B OS=Mus musculus GN=Fam221b PE=2 SV=1
F227B_MOUSE	Protein FAM227B OS=Mus musculus GN=Fam227b PE=2 SV=3
FA46B_MOUSE	Protein FAM46B OS=Mus musculus GN=Fam46b PE=2 SV=3
FA5_MOUSE	Coagulation factor V OS=Mus musculus GN=F5 PE=1 SV=1
FA65C_MOUSE	Protein FAM65C OS=Mus musculus GN=Fam65c PE=1 SV=1
FA78A_MOUSE	Protein FAM78A OS=Mus musculus GN=Fam78a PE=1 SV=1
FADD_MOUSE	FAS-associated death domain protein OS=Mus musculus GN=Fadd PE=1 SV=1
FANCM_MOUSE	Fanconi anemia group M protein homolog OS=Mus musculus GN=Fancm PE=1 SV=3
FBF1_MOUSE	Fas-binding factor 1 OS=Mus musculus GN=Fbf1 PE=1 SV=1
FBLN2_MOUSE	Fibulin-2 OS=Mus musculus GN=Fbln2 PE=1 SV=2
FBX47_MOUSE	F-box only protein 47 OS=Mus musculus GN=Fbxo47 PE=2 SV=2
FBXL6_MOUSE	F-box/LRR-repeat protein 6 OS=Mus musculus GN=Fbxl6 PE=2 SV=2
FCGRN_MOUSE	IgG receptor FcRn large subunit p51 OS=Mus musculus GN=Fcgrt PE=1 SV=1
FCRLA_MOUSE	Fc receptor-like A OS=Mus musculus GN=Fcrla PE=1 SV=1
FEZF1_MOUSE	Fez family zinc finger protein 1 OS=Mus musculus GN=Fezf1 PE=2 SV=1
FFAR3_MOUSE	Free fatty acid receptor 3 OS=Mus musculus GN=Ffar3 PE=1 SV=1
FGFR1_MOUSE	Fibroblast growth factor receptor 1 OS=Mus musculus GN=Fgfr1 PE=1 SV=2
FHDC1_MOUSE	FH2 domain-containing protein 1 OS=Mus musculus GN=Fhdc1 PE=1 SV=3
FIBA_MOUSE	Fibrinogen alpha chain OS=Mus musculus GN=Fga PE=1 SV=1
FKB11_MOUSE	Peptidyl-prolyl cis-trans isomerase FKBP11 OS=Mus musculus GN=Fkbp11 PE=1 SV=1
FKB15_MOUSE	FK506-binding protein 15 OS=Mus musculus GN=Fkbp15 PE=1 SV=2
FLOT1_MOUSE	Flotillin-1 OS=Mus musculus GN=Flot1 PE=1 SV=1
FMNL3_MOUSE	Formin-like protein 3 OS=Mus musculus GN=Fmnl3 PE=1 SV=2
FOG1_MOUSE	Zinc finger protein ZFPM1 OS=Mus musculus GN=Zfpm1 PE=1 SV=1
FOXG1_MOUSE	Forkhead box protein G1 OS=Mus musculus GN=Foxg1 PE=2 SV=1
FOXM1_MOUSE	Forkhead box protein M1 OS=Mus musculus GN=Foxm1 PE=1 SV=2
FRAT2_MOUSE	GSK-3-binding protein FRAT2 OS=Mus musculus GN=Frat2 PE=2 SV=1
FS2P1_MOUSE	Fatty acid desaturase 2-like protein FADS2P1 OS=Mus musculus GN=Fads2p1 PE=2 SV=1
FSIP1_MOUSE	Fibrous sheath-interacting protein 1 OS=Mus musculus GN=Fsip1 PE=1 SV=1
FYV1_MOUSE	1-phosphatidylinositol 3-phosphate 5-kinase OS=Mus musculus GN=Pikfyve PE=1 SV=3
FZD1_MOUSE	Frizzled-1 OS=Mus musculus GN=Fzd1 PE=2 SV=3
GAS8_MOUSE	Growth arrest-specific protein 8 OS=Mus musculus GN=Gas8 PE=1 SV=2
GATB_MOUSE	Glutamyl-tRNA(Gln) amidotransferase subunit B, mitochondrial OS=Mus musculus GN=Gatb PE=1 SV=1
GATL2_MOUSE	GATS-like protein 2 OS=Mus musculus GN=Gatsl2 PE=1 SV=1
GBB2_MOUSE	Guanine nucleotide-binding protein G(I)/G(S)/G(T) subunit beta-2 OS=Mus musculus GN=Gnb2 PE=1 SV=3
GBG5_MOUSE	Guanine nucleotide-binding protein G(I)/G(S)/G(O) subunit gamma-5 OS=Mus musculus GN=Gng5 PE=1 SV=2
GBG8_MOUSE	Guanine nucleotide-binding protein G(I)/G(S)/G(O) subunit gamma-8 OS=Mus musculus GN=Gng8 PE=3 SV=1
GBRL2_MOUSE	Gamma-aminobutyric acid receptor-associated protein-like 2 OS=Mus musculus GN=Gabarapl2 PE=1 SV=1
GCM2_MOUSE	Chorion-specific transcription factor GCMb OS=Mus musculus GN=Gcm2 PE=2 SV=2
GCP2_MOUSE	Gamma-tubulin complex component 2 OS=Mus musculus GN=Tubgcp2 PE=1 SV=2
GDF7_MOUSE	Growth/differentiation factor 7 OS=Mus musculus GN=Gdf7 PE=2 SV=2
GDF9_MOUSE	Growth/differentiation factor 9 OS=Mus musculus GN=Gdf9 PE=2 SV=2
GGNB2_MOUSE	Gametogenetin-binding protein 2 OS=Mus musculus GN=Ggnbp2 PE=1 SV=1
GL1D1_MOUSE	Glycosyltransferase 1 domain-containing protein 1 OS=Mus musculus GN=Glt1d1 PE=2 SV=2
GLGB_MOUSE	1,4-alpha-glucan-branching enzyme OS=Mus musculus GN=Gbe1 PE=1 SV=1
GLI2_MOUSE	Zinc finger protein GLI2 OS=Mus musculus GN=Gli2 PE=1 SV=2
GLIS1_MOUSE	Zinc finger protein GLIS1 OS=Mus musculus GN=Glis1 PE=2 SV=2
GLRA4_MOUSE	Glycine receptor subunit alpha-4 OS=Mus musculus GN=Glra4 PE=2 SV=3
GMCLL_MOUSE	Putative germ cell-less protein-like 1-like OS=Mus musculus GN=GMCL1P1 PE=2 SV=2
GMEB1_MOUSE	Glucocorticoid modulatory element-binding protein 1 OS=Mus musculus GN=Gmeb1 PE=1 SV=2
GMIP_MOUSE	GEM-interacting protein OS=Mus musculus GN=Gmip PE=1 SV=1
GNAI3_MOUSE	Guanine nucleotide-binding protein G(k) subunit alpha OS=Mus musculus GN=Gnai3 PE=1 SV=3
GOGA1_MOUSE	Golgin subfamily A member 1 OS=Mus musculus GN=Golga1 PE=1 SV=2
GOLP3_MOUSE	Golgi phosphoprotein 3 OS=Mus musculus GN=Golph3 PE=1 SV=1
GOPC_MOUSE	Golgi-associated PDZ and coiled-coil motif-containing protein OS=Mus musculus GN=Gopc PE=1 SV=1
GPAT2_MOUSE	Glycerol-3-phosphate acyltransferase 2, mitochondrial OS=Mus musculus GN=Gpat2 PE=1 SV=3
GPC5B_MOUSE	G-protein coupled receptor family C group 5 member B OS=Mus musculus GN=Gprc5b PE=1 SV=1
GPKOW_MOUSE	G patch domain and KOW motifs-containing protein OS=Mus musculus GN=Gpkow PE=1 SV=2
GRAC_MOUSE	Granzyme C OS=Mus musculus GN=Gzmc PE=1 SV=1
GRAP1_MOUSE	GRIP1-associated protein 1 OS=Mus musculus GN=Gripap1 PE=1 SV=1
GRIA3_MOUSE	Glutamate receptor 3 OS=Mus musculus GN=Gria3 PE=1 SV=2
GRN_MOUSE	Granulins OS=Mus musculus GN=Grn PE=1 SV=2
GRP4_MOUSE	RAS guanyl-releasing protein 4 OS=Mus musculus GN=Rasgrp4 PE=1 SV=1
GSE1_MOUSE	Genetic suppressor element 1 OS=Mus musculus GN=Gse1 PE=1 SV=2
GSHB_MOUSE	Glutathione synthetase OS=Mus musculus GN=Gss PE=1 SV=1
GSK3A_MOUSE	Glycogen synthase kinase-3 alpha OS=Mus musculus GN=Gsk3a PE=1 SV=2
GSTT4_MOUSE	Glutathione S-transferase theta-4 OS=Mus musculus GN=Gstt4 PE=2 SV=1
GT251_MOUSE	Procollagen galactosyltransferase 1 OS=Mus musculus GN=Colgalt1 PE=1 SV=2
GTF2I_MOUSE	General transcription factor II-I OS=Mus musculus GN=Gtf2i PE=1 SV=3
GTPB2_MOUSE	GTP-binding protein 2 OS=Mus musculus GN=Gtpbp2 PE=1 SV=1
GTPBA_MOUSE	GTP-binding protein 10 OS=Mus musculus GN=Gtpbp10 PE=2 SV=1
GUC1A_MOUSE	Guanylyl cyclase-activating protein 1 OS=Mus musculus GN=Guca1a PE=2 SV=3
H11_MOUSE	Histone H1.1 OS=Mus musculus GN=Hist1h1a PE=1 SV=2
H2AB1_MOUSE	Histone H2A-Bbd type 1 OS=Mus musculus GN=H2afb1 PE=2 SV=1
H6ST2_MOUSE	Heparan-sulfate 6-O-sulfotransferase 2 OS=Mus musculus GN=Hs6st2 PE=2 SV=3
HA10_MOUSE	H-2 class I histocompatibility antigen, Q10 alpha chain OS=Mus musculus GN=H2-Q10 PE=1 SV=3
HACE1_MOUSE	E3 ubiquitin-protein ligase HACE1 OS=Mus musculus GN=Hace1 PE=1 SV=1
HCFC2_MOUSE	Host cell factor 2 OS=Mus musculus GN=Hcfc2 PE=1 SV=1
HD_MOUSE	Huntingtin OS=Mus musculus GN=Htt PE=1 SV=2
HEAT3_MOUSE	HEAT repeat-containing protein 3 OS=Mus musculus GN=Heatr3 PE=1 SV=1
HECD2_MOUSE	Probable E3 ubiquitin-protein ligase HECTD2 OS=Mus musculus GN=Hectd2 PE=1 SV=2
HERC4_MOUSE	Probable E3 ubiquitin-protein ligase HERC4 OS=Mus musculus GN=Herc4 PE=1 SV=2
HERC6_MOUSE	E3 ISG15--protein ligase Herc6 OS=Mus musculus GN=Herc6 PE=2 SV=1
HES1_MOUSE	Transcription factor HES-1 OS=Mus musculus GN=Hes1 PE=1 SV=1
HIPK3_MOUSE	Homeodomain-interacting protein kinase 3 OS=Mus musculus GN=Hipk3 PE=1 SV=3
HIRP3_MOUSE	HIRA-interacting protein 3 OS=Mus musculus GN=Hirip3 PE=1 SV=1
HLF_MOUSE	Hepatic leukemia factor OS=Mus musculus GN=Hlf PE=2 SV=1
HLTF_MOUSE	Helicase-like transcription factor OS=Mus musculus GN=Hltf PE=1 SV=1
HN1L_MOUSE	Hematological and neurological expressed 1-like protein OS=Mus musculus GN=Hn1l PE=1 SV=1
HNMT_MOUSE	Histamine N-methyltransferase OS=Mus musculus GN=Hnmt PE=1 SV=1
HORM2_MOUSE	HORMA domain-containing protein 2 OS=Mus musculus GN=Hormad2 PE=1 SV=1
HPS1_MOUSE	Hermansky-Pudlak syndrome 1 protein homolog OS=Mus musculus GN=Hps1 PE=2 SV=2
HRH3_MOUSE	Histamine H3 receptor OS=Mus musculus GN=Hrh3 PE=1 SV=1
HS105_MOUSE	Heat shock protein 105 kDa OS=Mus musculus GN=Hsph1 PE=1 SV=2
HSDL2_MOUSE	Hydroxysteroid dehydrogenase-like protein 2 OS=Mus musculus GN=Hsdl2 PE=1 SV=1
HSPB1_MOUSE	Heat shock protein beta-1 OS=Mus musculus GN=Hspb1 PE=1 SV=3
HXB13_MOUSE	Homeobox protein Hox-B13 OS=Mus musculus GN=Hoxb13 PE=2 SV=1
HXB4_MOUSE	Homeobox protein Hox-B4 OS=Mus musculus GN=Hoxb4 PE=2 SV=1
HXK4_MOUSE	Glucokinase OS=Mus musculus GN=Gck PE=1 SV=1
I23O1_MOUSE	Indoleamine 2,3-dioxygenase 1 OS=Mus musculus GN=Ido1 PE=1 SV=1
I2BP2_MOUSE	Interferon regulatory factor 2-binding protein 2 OS=Mus musculus GN=Irf2bp2 PE=1 SV=1
IC1_MOUSE	Plasma protease C1 inhibitor OS=Mus musculus GN=Serping1 PE=1 SV=3
ICA_MOUSE	Inhibitor of carbonic anhydrase OS=Mus musculus GN=Ica PE=1 SV=1
ICE1_MOUSE	Little elongation complex subunit 1 OS=Mus musculus GN=Ice1 PE=1 SV=1
IDI2_MOUSE	Isopentenyl-diphosphate delta-isomerase 2 OS=Mus musculus GN=Idi2 PE=2 SV=1
IF122_MOUSE	Intraflagellar transport protein 122 homolog OS=Mus musculus GN=Ift122 PE=1 SV=1
IF2B2_MOUSE	Insulin-like growth factor 2 mRNA-binding protein 2 OS=Mus musculus GN=Igf2bp2 PE=1 SV=1
IF5A2_MOUSE	Eukaryotic translation initiation factor 5A-2 OS=Mus musculus GN=Eif5a2 PE=1 SV=3
IFG15_MOUSE	Torsin-1A-interacting protein 2, isoform IFRG15 OS=Mus musculus GN=Tor1aip2 PE=1 SV=1
IFM2_MOUSE	Interferon-induced transmembrane protein 2 OS=Mus musculus GN=Ifitm2 PE=1 SV=1
IFT25_MOUSE	Intraflagellar transport protein 25 homolog OS=Mus musculus GN=Hspb11 PE=1 SV=2
IFT80_MOUSE	Intraflagellar transport protein 80 homolog OS=Mus musculus GN=Ift80 PE=1 SV=1
IGHM_MOUSE	Ig mu chain C region OS=Mus musculus GN=Ighm PE=1 SV=2
IKZF1_MOUSE	DNA-binding protein Ikaros OS=Mus musculus GN=Ikzf1 PE=1 SV=2
IL31R_MOUSE	Interleukin-31 receptor subunit alpha OS=Mus musculus GN=Il31ra PE=1 SV=3
ILK_MOUSE	Integrin-linked protein kinase OS=Mus musculus GN=Ilk PE=1 SV=2
ILRL2_MOUSE	Interleukin-1 receptor-like 2 OS=Mus musculus GN=Il1rl2 PE=1 SV=1
IMA4_MOUSE	Importin subunit alpha-4 OS=Mus musculus GN=Kpna3 PE=1 SV=1
IMP1L_MOUSE	Mitochondrial inner membrane protease subunit 1 OS=Mus musculus GN=Immp1l PE=1 SV=1
IMP2L_MOUSE	Mitochondrial inner membrane protease subunit 2 OS=Mus musculus GN=Immp2l PE=1 SV=1
INAR1_MOUSE	Interferon alpha/beta receptor 1 OS=Mus musculus GN=Ifnar1 PE=1 SV=2
INF2_MOUSE	Inverted formin-2 OS=Mus musculus GN=Inf2 PE=1 SV=1
INSM1_MOUSE	Insulinoma-associated protein 1 OS=Mus musculus GN=Insm1 PE=1 SV=1
INVS_MOUSE	Inversin OS=Mus musculus GN=Invs PE=1 SV=2
IQCG_MOUSE	IQ domain-containing protein G OS=Mus musculus GN=Iqcg PE=2 SV=1
IQCH_MOUSE	IQ domain-containing protein H OS=Mus musculus GN=Iqch PE=2 SV=3
IRAK2_MOUSE	Interleukin-1 receptor-associated kinase-like 2 OS=Mus musculus GN=Irak2 PE=2 SV=2
IRF4_MOUSE	Interferon regulatory factor 4 OS=Mus musculus GN=Irf4 PE=1 SV=1
ISCA2_MOUSE	Iron-sulfur cluster assembly 2 homolog, mitochondrial OS=Mus musculus GN=Isca2 PE=1 SV=2
ISCU_MOUSE	Iron-sulfur cluster assembly enzyme ISCU, mitochondrial OS=Mus musculus GN=Iscu PE=1 SV=1
ISG20_MOUSE	Interferon-stimulated gene 20 kDa protein OS=Mus musculus GN=Isg20 PE=1 SV=1
ISLR2_MOUSE	Immunoglobulin superfamily containing leucine-rich repeat protein 2 OS=Mus musculus GN=Islr2 PE=1 SV=1
ITA5_MOUSE	Integrin alpha-5 OS=Mus musculus GN=Itga5 PE=1 SV=3
ITA6_MOUSE	Integrin alpha-6 OS=Mus musculus GN=Itga6 PE=1 SV=3
ITA7_MOUSE	Integrin alpha-7 OS=Mus musculus GN=Itga7 PE=1 SV=3
ITA8_MOUSE	Integrin alpha-8 OS=Mus musculus GN=Itga8 PE=1 SV=1
ITPR2_MOUSE	Inositol 1,4,5-trisphosphate receptor type 2 OS=Mus musculus GN=Itpr2 PE=1 SV=4
ITPR3_MOUSE	Inositol 1,4,5-trisphosphate receptor type 3 OS=Mus musculus GN=Itpr3 PE=1 SV=3
ITSN1_MOUSE	Intersectin-1 OS=Mus musculus GN=Itsn1 PE=1 SV=2
IZUM2_MOUSE	Izumo sperm-egg fusion protein 2 OS=Mus musculus GN=Izumo2 PE=2 SV=2
JIP1_MOUSE	C-Jun-amino-terminal kinase-interacting protein 1 OS=Mus musculus GN=Mapk8ip1 PE=1 SV=2
JIP2_MOUSE	C-Jun-amino-terminal kinase-interacting protein 2 OS=Mus musculus GN=Mapk8ip2 PE=1 SV=1
JIP4_MOUSE	C-Jun-amino-terminal kinase-interacting protein 4 OS=Mus musculus GN=Spag9 PE=1 SV=2
JKAMP_MOUSE	JNK1/MAPK8-associated membrane protein OS=Mus musculus GN=Jkamp PE=1 SV=2
JKIP1_MOUSE	Janus kinase and microtubule-interacting protein 1 OS=Mus musculus GN=Jakmip1 PE=1 SV=2
JUNO_MOUSE	Sperm-egg fusion protein Juno OS=Mus musculus GN=Izumo1r PE=1 SV=1
K0020_MOUSE	Pumilio domain-containing protein KIAA0020 OS=Mus musculus GN=Kiaa0020 PE=1 SV=2
K0753_MOUSE	Uncharacterized protein KIAA0753 OS=Mus musculus GN=Kiaa0753 PE=2 SV=2
K1024_MOUSE	UPF0258 protein KIAA1024 OS=Mus musculus GN=Kiaa1024 PE=1 SV=1
K1755_MOUSE	Uncharacterized protein KIAA1755 homolog OS=Mus musculus PE=2 SV=2
K1841_MOUSE	Uncharacterized protein KIAA1841 OS=Mus musculus GN=Kiaa1841 PE=1 SV=2
K1C13_MOUSE	Keratin, type I cytoskeletal 13 OS=Mus musculus GN=Krt13 PE=1 SV=2
K1KB4_MOUSE	Kallikrein 1-related peptidase-like b4 OS=Mus musculus GN=Klk1b4 PE=1 SV=1
K2C1B_MOUSE	Keratin, type II cytoskeletal 1b OS=Mus musculus GN=Krt77 PE=1 SV=1
K2C6B_MOUSE	Keratin, type II cytoskeletal 6B OS=Mus musculus GN=Krt6b PE=1 SV=3
K2C73_MOUSE	Keratin, type II cytoskeletal 73 OS=Mus musculus GN=Krt73 PE=1 SV=1
K2C75_MOUSE	Keratin, type II cytoskeletal 75 OS=Mus musculus GN=Krt75 PE=1 SV=1
KAPCB_MOUSE	cAMP-dependent protein kinase catalytic subunit beta OS=Mus musculus GN=Prkacb PE=1 SV=2
KAT6A_MOUSE	Histone acetyltransferase KAT6A OS=Mus musculus GN=Kat6a PE=1 SV=2
KC1G2_MOUSE	Casein kinase I isoform gamma-2 OS=Mus musculus GN=Csnk1g2 PE=1 SV=1
KCD12_MOUSE	BTB/POZ domain-containing protein KCTD12 OS=Mus musculus GN=Kctd12 PE=1 SV=1
KCNG1_MOUSE	Potassium voltage-gated channel subfamily G member 1 OS=Mus musculus GN=Kcng1 PE=3 SV=1
KCNK1_MOUSE	Potassium channel subfamily K member 1 OS=Mus musculus GN=Kcnk1 PE=1 SV=2
KCNN2_MOUSE	Small conductance calcium-activated potassium channel protein 2 OS=Mus musculus GN=Kcnn2 PE=1 SV=2
KCNN4_MOUSE	Intermediate conductance calcium-activated potassium channel protein 4 OS=Mus musculus GN=Kcnn4 PE=2 SV=1
KCNQ4_MOUSE	Potassium voltage-gated channel subfamily KQT member 4 OS=Mus musculus GN=Kcnq4 PE=2 SV=2
KCRS_MOUSE	Creatine kinase S-type, mitochondrial OS=Mus musculus GN=Ckmt2 PE=1 SV=1
KDM3A_MOUSE	Lysine-specific demethylase 3A OS=Mus musculus GN=Kdm3a PE=1 SV=1
KDM4C_MOUSE	Lysine-specific demethylase 4C OS=Mus musculus GN=Kdm4c PE=1 SV=1
KDM5A_MOUSE	Lysine-specific demethylase 5A OS=Mus musculus GN=Kdm5a PE=1 SV=2
KDM5B_MOUSE	Lysine-specific demethylase 5B OS=Mus musculus GN=Kdm5b PE=1 SV=1
KDM5C_MOUSE	Lysine-specific demethylase 5C OS=Mus musculus GN=Kdm5c PE=1 SV=4
KGP2_MOUSE	cGMP-dependent protein kinase 2 OS=Mus musculus GN=Prkg2 PE=1 SV=1
KI16B_MOUSE	Kinesin-like protein KIF16B OS=Mus musculus GN=Kif16b PE=1 SV=1
KI20B_MOUSE	Kinesin-like protein KIF20B OS=Mus musculus GN=Kif20b PE=1 SV=3
KIF12_MOUSE	Kinesin-like protein KIF12 OS=Mus musculus GN=Kif12 PE=1 SV=1
KIF2C_MOUSE	Kinesin-like protein KIF2C OS=Mus musculus GN=Kif2c PE=1 SV=1
KIF5A_MOUSE	Kinesin heavy chain isoform 5A OS=Mus musculus GN=Kif5a PE=1 SV=3
KISS1_MOUSE	Metastasis-suppressor KiSS-1 OS=Mus musculus GN=Kiss1 PE=1 SV=2
KIZ_MOUSE	Centrosomal protein kizuna OS=Mus musculus GN=Kiz PE=1 SV=1
KLH20_MOUSE	Kelch-like protein 20 OS=Mus musculus GN=Klhl20 PE=2 SV=2
KLH30_MOUSE	Kelch-like protein 30 OS=Mus musculus GN=Klhl30 PE=2 SV=1
KLH36_MOUSE	Kelch-like protein 36 OS=Mus musculus GN=Klhl36 PE=1 SV=1
KLHL9_MOUSE	Kelch-like protein 9 OS=Mus musculus GN=Klhl9 PE=2 SV=2
KLOTB_MOUSE	Beta-klotho OS=Mus musculus GN=Klb PE=1 SV=1
KLRA2_MOUSE	Killer cell lectin-like receptor 2 OS=Mus musculus GN=Klra2 PE=2 SV=1
KMT2A_MOUSE	Histone-lysine N-methyltransferase 2A OS=Mus musculus GN=Kmt2a PE=1 SV=3
KMT2D_MOUSE	Histone-lysine N-methyltransferase 2D OS=Mus musculus GN=Kmt2d PE=1 SV=2
KPB2_MOUSE	Phosphorylase b kinase regulatory subunit alpha, liver isoform OS=Mus musculus GN=Phka2 PE=1 SV=1
KPCD3_MOUSE	Serine/threonine-protein kinase D3 OS=Mus musculus GN=Prkd3 PE=1 SV=1
KPCZ_MOUSE	Protein kinase C zeta type OS=Mus musculus GN=Prkcz PE=1 SV=2
KPSH1_MOUSE	Serine/threonine-protein kinase H1 OS=Mus musculus GN=Pskh1 PE=2 SV=3
KRI1_MOUSE	Protein KRI1 homolog OS=Mus musculus GN=Kri1 PE=1 SV=3
KS6A2_MOUSE	Ribosomal protein S6 kinase alpha-2 OS=Mus musculus GN=Rps6ka2 PE=1 SV=1
KS6A4_MOUSE	Ribosomal protein S6 kinase alpha-4 OS=Mus musculus GN=Rps6ka4 PE=1 SV=2
KS6A5_MOUSE	Ribosomal protein S6 kinase alpha-5 OS=Mus musculus GN=Rps6ka5 PE=1 SV=2
KT222_MOUSE	Keratin-like protein KRT222 OS=Mus musculus GN=Krt222 PE=2 SV=1
LAD1_MOUSE	Ladinin-1 OS=Mus musculus GN=Lad1 PE=1 SV=1
LAMA3_MOUSE	Laminin subunit alpha-3 OS=Mus musculus GN=Lama3 PE=1 SV=4
LAMA5_MOUSE	Laminin subunit alpha-5 OS=Mus musculus GN=Lama5 PE=1 SV=4
LAMC2_MOUSE	Laminin subunit gamma-2 OS=Mus musculus GN=Lamc2 PE=1 SV=2
LAMC3_MOUSE	Laminin subunit gamma-3 OS=Mus musculus GN=Lamc3 PE=1 SV=2
LARP7_MOUSE	La-related protein 7 OS=Mus musculus GN=Larp7 PE=1 SV=2
LCK_MOUSE	Proto-oncogene tyrosine-protein kinase LCK OS=Mus musculus GN=Lck PE=1 SV=4
LDB1_MOUSE	LIM domain-binding protein 1 OS=Mus musculus GN=Ldb1 PE=1 SV=2
LDB3_MOUSE	LIM domain-binding protein 3 OS=Mus musculus GN=Ldb3 PE=1 SV=1
LEG2_MOUSE	Galectin-2 OS=Mus musculus GN=Lgals2 PE=1 SV=1
LEG8_MOUSE	Galectin-8 OS=Mus musculus GN=Lgals8 PE=1 SV=1
LGI1_MOUSE	Leucine-rich glioma-inactivated protein 1 OS=Mus musculus GN=Lgi1 PE=1 SV=1
LHX1_MOUSE	LIM/homeobox protein Lhx1 OS=Mus musculus GN=Lhx1 PE=1 SV=1
LHX4_MOUSE	LIM/homeobox protein Lhx4 OS=Mus musculus GN=Lhx4 PE=1 SV=4
LIPA2_MOUSE	Liprin-alpha-2 OS=Mus musculus GN=Ppfia2 PE=1 SV=2
LIPB1_MOUSE	Liprin-beta-1 OS=Mus musculus GN=Ppfibp1 PE=1 SV=3
LIPG_MOUSE	Gastric triacylglycerol lipase OS=Mus musculus GN=Lipf PE=2 SV=1
LMA2L_MOUSE	VIP36-like protein OS=Mus musculus GN=Lman2l PE=1 SV=1
LMBL3_MOUSE	Lethal(3)malignant brain tumor-like protein 3 OS=Mus musculus GN=L3mbtl3 PE=1 SV=1
LMTD2_MOUSE	Lamin tail domain-containing protein 2 OS=Mus musculus GN=Lmntd2 PE=2 SV=1
LOXE3_MOUSE	Hydroperoxide isomerase ALOXE3 OS=Mus musculus GN=Aloxe3 PE=1 SV=2
LR74B_MOUSE	Leucine-rich repeat-containing protein 74B OS=Mus musculus GN=Lrrc74b PE=2 SV=1
LRC14_MOUSE	Leucine-rich repeat-containing protein 14 OS=Mus musculus GN=Lrrc14 PE=1 SV=1
LRC23_MOUSE	Leucine-rich repeat-containing protein 23 OS=Mus musculus GN=Lrrc23 PE=1 SV=1
LRC43_MOUSE	Leucine-rich repeat-containing protein 43 OS=Mus musculus GN=Lrrc43 PE=2 SV=1
LRC56_MOUSE	Leucine-rich repeat-containing protein 56 OS=Mus musculus GN=Lrrc56 PE=2 SV=1
LRC71_MOUSE	Leucine-rich repeat-containing protein 71 OS=Mus musculus GN=Lrrc71 PE=2 SV=1
LRIQ3_MOUSE	Leucine-rich repeat and IQ domain-containing protein 3 OS=Mus musculus GN=Lrriq3 PE=2 SV=1
LRIQ4_MOUSE	Leucine-rich repeat and IQ domain-containing protein 4 OS=Mus musculus GN=Lrriq4 PE=2 SV=1
LRP4_MOUSE	Low-density lipoprotein receptor-related protein 4 OS=Mus musculus GN=Lrp4 PE=1 SV=3
LRRC2_MOUSE	Leucine-rich repeat-containing protein 2 OS=Mus musculus GN=Lrrc2 PE=2 SV=1
LRRD1_MOUSE	Leucine-rich repeat and death domain-containing protein 1 OS=Mus musculus GN=Lrrd1 PE=2 SV=2
LRRK2_MOUSE	Leucine-rich repeat serine/threonine-protein kinase 2 OS=Mus musculus GN=Lrrk2 PE=1 SV=2
LSM12_MOUSE	Protein LSM12 homolog OS=Mus musculus GN=Lsm12 PE=1 SV=1
LSM6_MOUSE	U6 snRNA-associated Sm-like protein LSm6 OS=Mus musculus GN=Lsm6 PE=1 SV=1
LX12B_MOUSE	Arachidonate 12-lipoxygenase, 12R-type OS=Mus musculus GN=Alox12b PE=1 SV=1
LY65C_MOUSE	Lymphocyte antigen 6 complex locus protein G5c OS=Mus musculus GN=Ly6g5c PE=1 SV=1
LY6K_MOUSE	Lymphocyte antigen 6K OS=Mus musculus GN=Ly6k PE=1 SV=1
LYG1_MOUSE	Lysozyme g-like protein 1 OS=Mus musculus GN=Lyg1 PE=2 SV=1
LYPA2_MOUSE	Acyl-protein thioesterase 2 OS=Mus musculus GN=Lypla2 PE=1 SV=1
LYRM7_MOUSE	Complex III assembly factor LYRM7 OS=Mus musculus GN=Lyrm7 PE=3 SV=2
LYRM9_MOUSE	LYR motif-containing protein 9 OS=Mus musculus GN=Lyrm9 PE=3 SV=1
LYST_MOUSE	Lysosomal-trafficking regulator OS=Mus musculus GN=Lyst PE=1 SV=1
LYZL4_MOUSE	Lysozyme-like protein 4 OS=Mus musculus GN=Lyzl4 PE=1 SV=3
M3K10_MOUSE	Mitogen-activated protein kinase kinase kinase 10 OS=Mus musculus GN=Map3k10 PE=1 SV=2
M3K15_MOUSE	Mitogen-activated protein kinase kinase kinase 15 OS=Mus musculus GN=Map3k15 PE=1 SV=1
M3K4_MOUSE	Mitogen-activated protein kinase kinase kinase 4 OS=Mus musculus GN=Map3k4 PE=1 SV=2
M3K7_MOUSE	Mitogen-activated protein kinase kinase kinase 7 OS=Mus musculus GN=Map3k7 PE=1 SV=1
M3K9_MOUSE	Mitogen-activated protein kinase kinase kinase 9 OS=Mus musculus GN=Map3k9 PE=2 SV=2
MAGI2_MOUSE	Membrane-associated guanylate kinase, WW and PDZ domain-containing protein 2 OS=Mus musculus GN=Magi2 PE=1 SV=2
MANEL_MOUSE	Glycoprotein endo-alpha-1,2-mannosidase-like protein OS=Mus musculus GN=Maneal PE=2 SV=1
MAP1A_MOUSE	Microtubule-associated protein 1A OS=Mus musculus GN=Map1a PE=1 SV=2
MAPK3_MOUSE	MAP kinase-activated protein kinase 3 OS=Mus musculus GN=Mapkapk3 PE=1 SV=2
MARK1_MOUSE	Serine/threonine-protein kinase MARK1 OS=Mus musculus GN=Mark1 PE=1 SV=2
MATN3_MOUSE	Matrilin-3 OS=Mus musculus GN=Matn3 PE=1 SV=2
MBD5_MOUSE	Methyl-CpG-binding domain protein 5 OS=Mus musculus GN=Mbd5 PE=2 SV=1
MCA3_MOUSE	Eukaryotic translation elongation factor 1 epsilon-1 OS=Mus musculus GN=Eef1e1 PE=1 SV=1
MCP_MOUSE	Membrane cofactor protein OS=Mus musculus GN=Cd46 PE=1 SV=1
MCTS2_MOUSE	Malignant T-cell-amplified sequence 2 OS=Mus musculus GN=Mcts2 PE=1 SV=1
MED14_MOUSE	Mediator of RNA polymerase II transcription subunit 14 OS=Mus musculus GN=Med14 PE=1 SV=1
MED17_MOUSE	Mediator of RNA polymerase II transcription subunit 17 OS=Mus musculus GN=Med17 PE=1 SV=1
MEGF8_MOUSE	Multiple epidermal growth factor-like domains protein 8 OS=Mus musculus GN=Megf8 PE=1 SV=2
MEII1_MOUSE	Meiosis inhibitor protein 1 OS=Mus musculus GN=Mei1 PE=2 SV=3
MEIS1_MOUSE	Homeobox protein Meis1 OS=Mus musculus GN=Meis1 PE=1 SV=1
MELT_MOUSE	Ventricular zone-expressed PH domain-containing protein 1 OS=Mus musculus GN=Veph1 PE=2 SV=2
MEOX1_MOUSE	Homeobox protein MOX-1 OS=Mus musculus GN=Meox1 PE=1 SV=1
METL6_MOUSE	Methyltransferase-like protein 6 OS=Mus musculus GN=Mettl6 PE=2 SV=2
MGAP_MOUSE	MAX gene-associated protein OS=Mus musculus GN=Mga PE=2 SV=1
MGN_MOUSE	Protein mago nashi homolog OS=Mus musculus GN=Magoh PE=2 SV=1
MIC13_MOUSE	MICOS complex subunit MIC13 OS=Mus musculus GN=Mic13 PE=1 SV=1
MIDN_MOUSE	Midnolin OS=Mus musculus GN=Midn PE=2 SV=1
MINK1_MOUSE	Misshapen-like kinase 1 OS=Mus musculus GN=Mink1 PE=1 SV=3
MIPEP_MOUSE	Mitochondrial intermediate peptidase OS=Mus musculus GN=Mipep PE=1 SV=1
MIS_MOUSE	Muellerian-inhibiting factor OS=Mus musculus GN=Amh PE=2 SV=1
MK06_MOUSE	Mitogen-activated protein kinase 6 OS=Mus musculus GN=Mapk6 PE=1 SV=3
MK15_MOUSE	Mitogen-activated protein kinase 15 OS=Mus musculus GN=Mapk15 PE=1 SV=1
MKL1_MOUSE	MKL/myocardin-like protein 1 OS=Mus musculus GN=Mkl1 PE=1 SV=2
MKLN1_MOUSE	Muskelin OS=Mus musculus GN=Mkln1 PE=1 SV=1
MOB1A_MOUSE	MOB kinase activator 1A OS=Mus musculus GN=Mob1a PE=2 SV=3
MOV10_MOUSE	Putative helicase MOV-10 OS=Mus musculus GN=Mov10 PE=1 SV=2
MPP10_MOUSE	U3 small nucleolar ribonucleoprotein protein MPP10 OS=Mus musculus GN=Mphosph10 PE=1 SV=2
MPP5_MOUSE	MAGUK p55 subfamily member 5 OS=Mus musculus GN=Mpp5 PE=1 SV=1
MRCKB_MOUSE	Serine/threonine-protein kinase MRCK beta OS=Mus musculus GN=Cdc42bpb PE=1 SV=2
MRO2A_MOUSE	Maestro heat-like repeat-containing protein family member 2A OS=Mus musculus GN=Mroh2a PE=1 SV=2
MROH7_MOUSE	Maestro heat-like repeat-containing protein family member 7 OS=Mus musculus GN=Mroh7 PE=4 SV=1
MRP2_MOUSE	Canalicular multispecific organic anion transporter 1 OS=Mus musculus GN=Abcc2 PE=1 SV=2
MSH5_MOUSE	MutS protein homolog 5 OS=Mus musculus GN=Msh5 PE=2 SV=1
MSRB2_MOUSE	Methionine-R-sulfoxide reductase B2, mitochondrial OS=Mus musculus GN=Msrb2 PE=1 SV=1
MSTO1_MOUSE	Protein misato homolog 1 OS=Mus musculus GN=Msto1 PE=1 SV=1
MSTRO_MOUSE	Protein maestro OS=Mus musculus GN=Mro PE=2 SV=1
MT21E_MOUSE	Protein-lysine methyltransferase METTL21E OS=Mus musculus GN=Mettl21e PE=2 SV=1
MTD2L_MOUSE	Probable bifunctional methylenetetrahydrofolate dehydrogenase/cyclohydrolase 2 OS=Mus musculus GN=Mthfd2l PE=3 SV=1
MTFP1_MOUSE	Mitochondrial fission process protein 1 OS=Mus musculus GN=Mtfp1 PE=1 SV=1
MTHR_MOUSE	Methylenetetrahydrofolate reductase OS=Mus musculus GN=Mthfr PE=1 SV=2
MTMR1_MOUSE	Myotubularin-related protein 1 OS=Mus musculus GN=Mtmr1 PE=1 SV=1
MTMR7_MOUSE	Myotubularin-related protein 7 OS=Mus musculus GN=Mtmr7 PE=1 SV=2
MTMRB_MOUSE	Myotubularin-related protein 11 OS=Mus musculus GN=Mtmr11 PE=2 SV=1
MTU1_MOUSE	Mitochondrial tRNA-specific 2-thiouridylase 1 OS=Mus musculus GN=Trmu PE=1 SV=1
MTUS2_MOUSE	Microtubule-associated tumor suppressor candidate 2 homolog OS=Mus musculus GN=Mtus2 PE=1 SV=1
MYH7B_MOUSE	Myosin-7B OS=Mus musculus GN=Myh7b PE=3 SV=1
MYO10_MOUSE	Unconventional myosin-X OS=Mus musculus GN=Myo10 PE=1 SV=1
MYO15_MOUSE	Unconventional myosin-XV OS=Mus musculus GN=Myo15a PE=1 SV=2
MYO1F_MOUSE	Unconventional myosin-If OS=Mus musculus GN=Myo1f PE=1 SV=1
MYO7A_MOUSE	Unconventional myosin-VIIa OS=Mus musculus GN=Myo7a PE=1 SV=2
MYO7B_MOUSE	Unconventional myosin-VIIb OS=Mus musculus GN=Myo7b PE=1 SV=3
MYOM1_MOUSE	Myomesin-1 OS=Mus musculus GN=Myom1 PE=1 SV=2
MYPC2_MOUSE	Myosin-binding protein C, fast-type OS=Mus musculus GN=Mybpc2 PE=1 SV=1
N42L2_MOUSE	NEDD4-binding protein 2-like 2 OS=Mus musculus GN=N4bp2l2 PE=2 SV=2
NAL4F_MOUSE	NACHT, LRR and PYD domains-containing protein 4F OS=Mus musculus GN=Nlrp4f PE=2 SV=1
NALP5_MOUSE	NACHT, LRR and PYD domains-containing protein 5 OS=Mus musculus GN=Nlrp5 PE=1 SV=2
NC2B_MOUSE	Protein Dr1 OS=Mus musculus GN=Dr1 PE=1 SV=1
NCK5L_MOUSE	Nck-associated protein 5-like OS=Mus musculus GN=Nckap5l PE=1 SV=1
NCOA2_MOUSE	Nuclear receptor coactivator 2 OS=Mus musculus GN=Ncoa2 PE=1 SV=3
NCOR1_MOUSE	Nuclear receptor corepressor 1 OS=Mus musculus GN=Ncor1 PE=1 SV=1
NDKM_MOUSE	Nucleoside diphosphate kinase, mitochondrial OS=Mus musculus GN=Nme4 PE=1 SV=1
NDST3_MOUSE	Bifunctional heparan sulfate N-deacetylase/N-sulfotransferase 3 OS=Mus musculus GN=Ndst3 PE=2 SV=2
NDUF5_MOUSE	NADH dehydrogenase [ubiquinone] 1 alpha subcomplex assembly factor 5 OS=Mus musculus GN=Ndufaf5 PE=1 SV=1
NDUF6_MOUSE	NADH dehydrogenase (ubiquinone) complex I, assembly factor 6 OS=Mus musculus GN=Ndufaf6 PE=1 SV=1
NDUS6_MOUSE	NADH dehydrogenase [ubiquinone] iron-sulfur protein 6, mitochondrial OS=Mus musculus GN=Ndufs6 PE=1 SV=2
NEK9_MOUSE	Serine/threonine-protein kinase Nek9 OS=Mus musculus GN=Nek9 PE=1 SV=2
NEMF_MOUSE	Nuclear export mediator factor Nemf OS=Mus musculus GN=Nemf PE=1 SV=2
NET1_MOUSE	Netrin-1 OS=Mus musculus GN=Ntn1 PE=1 SV=3
NEUL4_MOUSE	Neuralized-like protein 4 OS=Mus musculus GN=Neurl4 PE=1 SV=1
NFM_MOUSE	Neurofilament medium polypeptide OS=Mus musculus GN=Nefm PE=1 SV=4
NGN1_MOUSE	Neurogenin-1 OS=Mus musculus GN=Neurog1 PE=1 SV=1
NIBAN_MOUSE	Protein Niban OS=Mus musculus GN=Fam129a PE=1 SV=2
NID1_MOUSE	Nidogen-1 OS=Mus musculus GN=Nid1 PE=1 SV=2
NINL_MOUSE	Ninein-like protein OS=Mus musculus GN=Ninl PE=1 SV=3
NIP7_MOUSE	60S ribosome subunit biogenesis protein NIP7 homolog OS=Mus musculus GN=Nip7 PE=1 SV=1
NK3R_MOUSE	Neuromedin-K receptor OS=Mus musculus GN=Tacr3 PE=2 SV=2
NKAP_MOUSE	NF-kappa-B-activating protein OS=Mus musculus GN=Nkap PE=2 SV=1
NKTR_MOUSE	NK-tumor recognition protein OS=Mus musculus GN=Nktr PE=1 SV=4
NKX24_MOUSE	Homeobox protein Nkx-2.4 OS=Mus musculus GN=Nkx2-4 PE=2 SV=2
NO40_MOUSE	Nucleolar protein of 40 kDa OS=Mus musculus GN=Zcchc17 PE=1 SV=1
NOL4_MOUSE	Nucleolar protein 4 OS=Mus musculus GN=Nol4 PE=2 SV=2
NOL8_MOUSE	Nucleolar protein 8 OS=Mus musculus GN=Nol8 PE=1 SV=2
NOSIP_MOUSE	Nitric oxide synthase-interacting protein OS=Mus musculus GN=Nosip PE=1 SV=1
NPL_MOUSE	N-acetylneuraminate lyase OS=Mus musculus GN=Npl PE=1 SV=1
NR2C1_MOUSE	Nuclear receptor subfamily 2 group C member 1 OS=Mus musculus GN=Nr2c1 PE=1 SV=3
NR2F6_MOUSE	Nuclear receptor subfamily 2 group F member 6 OS=Mus musculus GN=Nr2f6 PE=1 SV=2
NR6A1_MOUSE	Nuclear receptor subfamily 6 group A member 1 OS=Mus musculus GN=Nr6a1 PE=1 SV=1
NRIF2_MOUSE	Neurotrophin receptor-interacting factor 2 OS=Mus musculus GN=Nrif2 PE=1 SV=1
NS1BP_MOUSE	Influenza virus NS1A-binding protein homolog OS=Mus musculus GN=Ivns1abp PE=1 SV=2
NSD1_MOUSE	Histone-lysine N-methyltransferase, H3 lysine-36 and H4 lysine-20 specific OS=Mus musculus GN=Nsd1 PE=1 SV=1
NSMA2_MOUSE	Sphingomyelin phosphodiesterase 3 OS=Mus musculus GN=Smpd3 PE=1 SV=1
NSUN4_MOUSE	5-methylcytosine rRNA methyltransferase NSUN4 OS=Mus musculus GN=Nsun4 PE=1 SV=1
NTF2_MOUSE	Nuclear transport factor 2 OS=Mus musculus GN=Nutf2 PE=1 SV=1
NTM1A_MOUSE	N-terminal Xaa-Pro-Lys N-methyltransferase 1 OS=Mus musculus GN=Ntmt1 PE=1 SV=3
NTNG2_MOUSE	Netrin-G2 OS=Mus musculus GN=Ntng2 PE=1 SV=2
NUD16_MOUSE	U8 snoRNA-decapping enzyme OS=Mus musculus GN=Nudt16 PE=1 SV=1
NUDC2_MOUSE	NudC domain-containing protein 2 OS=Mus musculus GN=Nudcd2 PE=1 SV=1
NUP54_MOUSE	Nuclear pore complex protein Nup54 OS=Mus musculus GN=Nup54 PE=1 SV=1
NUPL1_MOUSE	Nucleoporin p58/p45 OS=Mus musculus GN=Nupl1 PE=1 SV=1
NWD1_MOUSE	NACHT domain- and WD repeat-containing protein 1 OS=Mus musculus GN=Nwd1 PE=2 SV=2
NWD2_MOUSE	NACHT and WD repeat domain-containing protein 2 OS=Mus musculus GN=Nwd2 PE=1 SV=2
NXPE4_MOUSE	NXPE family member 4 OS=Mus musculus GN=Nxpe4 PE=2 SV=1
NXPH1_MOUSE	Neurexophilin-1 OS=Mus musculus GN=Nxph1 PE=2 SV=2
NYAP2_MOUSE	Neuronal tyrosine-phosphorylated phosphoinositide-3-kinase adapter 2 OS=Mus musculus GN=Nyap2 PE=1 SV=1
OBSL1_MOUSE	Obscurin-like protein 1 OS=Mus musculus GN=Obsl1 PE=1 SV=1
OFD1_MOUSE	Oral-facial-digital syndrome 1 protein homolog OS=Mus musculus GN=Ofd1 PE=1 SV=1
ORC1_MOUSE	Origin recognition complex subunit 1 OS=Mus musculus GN=Orc1 PE=1 SV=2
OSR1_MOUSE	Protein odd-skipped-related 1 OS=Mus musculus GN=Osr1 PE=2 SV=1
OTOAN_MOUSE	Otoancorin OS=Mus musculus GN=Otoa PE=2 SV=1
OTOGL_MOUSE	Otogelin-like protein OS=Mus musculus GN=Otogl PE=1 SV=1
OTOL1_MOUSE	Otolin-1 OS=Mus musculus GN=Otol1 PE=1 SV=2
P63_MOUSE	Tumor protein 63 OS=Mus musculus GN=Tp63 PE=1 SV=1
P66B_MOUSE	Transcriptional repressor p66-beta OS=Mus musculus GN=Gatad2b PE=1 SV=1
P85B_MOUSE	Phosphatidylinositol 3-kinase regulatory subunit beta OS=Mus musculus GN=Pik3r2 PE=1 SV=2
PA24D_MOUSE	Cytosolic phospholipase A2 delta OS=Mus musculus GN=Pla2g4d PE=2 SV=3
PADI4_MOUSE	Protein-arginine deiminase type-4 OS=Mus musculus GN=Padi4 PE=2 SV=3
PAK1_MOUSE	Serine/threonine-protein kinase PAK 1 OS=Mus musculus GN=Pak1 PE=1 SV=1
PAMR1_MOUSE	Inactive serine protease PAMR1 OS=Mus musculus GN=Pamr1 PE=2 SV=3
PAOX_MOUSE	Peroxisomal N(1)-acetyl-spermine/spermidine oxidase OS=Mus musculus GN=Paox PE=1 SV=3
PAPD7_MOUSE	Non-canonical poly(A) RNA polymerase PAPD7 OS=Mus musculus GN=Papd7 PE=2 SV=2
PARG_MOUSE	Poly(ADP-ribose) glycohydrolase OS=Mus musculus GN=Parg PE=1 SV=2
PCD12_MOUSE	Protocadherin-12 OS=Mus musculus GN=Pcdh12 PE=1 SV=2
PCDG4_MOUSE	Protocadherin gamma-A4 OS=Mus musculus GN=Pcdhga4 PE=2 SV=1
PCDH8_MOUSE	Protocadherin-8 OS=Mus musculus GN=Pcdh8 PE=1 SV=1
PCDP1_MOUSE	Cilia- and flagella-associated protein 221 OS=Mus musculus GN=Cfap221 PE=1 SV=1
PCIF1_MOUSE	Phosphorylated CTD-interacting factor 1 OS=Mus musculus GN=Pcif1 PE=1 SV=1
PCNT_MOUSE	Pericentrin OS=Mus musculus GN=Pcnt PE=1 SV=2
PCP4_MOUSE	Purkinje cell protein 4 OS=Mus musculus GN=Pcp4 PE=3 SV=2
PCSK1_MOUSE	ProSAAS OS=Mus musculus GN=Pcsk1n PE=1 SV=2
PCY1A_MOUSE	Choline-phosphate cytidylyltransferase A OS=Mus musculus GN=Pcyt1a PE=1 SV=1
PDE10_MOUSE	cAMP and cAMP-inhibited cGMP 3',5'-cyclic phosphodiesterase 10A OS=Mus musculus GN=Pde10a PE=1 SV=2
PDE1A_MOUSE	Calcium/calmodulin-dependent 3',5'-cyclic nucleotide phosphodiesterase 1A OS=Mus musculus GN=Pde1a PE=1 SV=2
PDIP2_MOUSE	Polymerase delta-interacting protein 2 OS=Mus musculus GN=Poldip2 PE=1 SV=1
PDLI3_MOUSE	PDZ and LIM domain protein 3 OS=Mus musculus GN=Pdlim3 PE=1 SV=1
PDLI7_MOUSE	PDZ and LIM domain protein 7 OS=Mus musculus GN=Pdlim7 PE=1 SV=1
PDPK1_MOUSE	3-phosphoinositide-dependent protein kinase 1 OS=Mus musculus GN=Pdpk1 PE=1 SV=2
PDZ1I_MOUSE	PDZK1-interacting protein 1 OS=Mus musculus GN=Pdzk1ip1 PE=1 SV=1
PEA15_MOUSE	Astrocytic phosphoprotein PEA-15 OS=Mus musculus GN=Pea15 PE=1 SV=1
PEG3_MOUSE	Paternally-expressed gene 3 protein OS=Mus musculus GN=Peg3 PE=1 SV=1
PEN2_MOUSE	Gamma-secretase subunit PEN-2 OS=Mus musculus GN=Psenen PE=1 SV=1
PENK_MOUSE	Proenkephalin-A OS=Mus musculus GN=Penk PE=1 SV=2
PEPL1_MOUSE	Probable aminopeptidase NPEPL1 OS=Mus musculus GN=Npepl1 PE=1 SV=1
PFD5_MOUSE	Prefoldin subunit 5 OS=Mus musculus GN=Pfdn5 PE=1 SV=1
PGM2L_MOUSE	Glucose 1,6-bisphosphate synthase OS=Mus musculus GN=Pgm2l1 PE=1 SV=1
PGR1A_MOUSE	PAXIP1-associated glutamate-rich protein 1A OS=Mus musculus GN=Pagr1a PE=2 SV=1
PGTA_MOUSE	Geranylgeranyl transferase type-2 subunit alpha OS=Mus musculus GN=Rabggta PE=1 SV=1
PHEX_MOUSE	Metalloendopeptidase homolog PEX OS=Mus musculus GN=Phex PE=1 SV=1
PHF20_MOUSE	PHD finger protein 20 OS=Mus musculus GN=Phf20 PE=1 SV=2
PHIP_MOUSE	PH-interacting protein OS=Mus musculus GN=Phip PE=1 SV=2
PHLB1_MOUSE	Pleckstrin homology-like domain family B member 1 OS=Mus musculus GN=Phldb1 PE=1 SV=1
PHS2_MOUSE	Pterin-4-alpha-carbinolamine dehydratase 2 OS=Mus musculus GN=Pcbd2 PE=1 SV=2
PI3R4_MOUSE	Phosphoinositide 3-kinase regulatory subunit 4 OS=Mus musculus GN=Pik3r4 PE=1 SV=3
PI42B_MOUSE	Phosphatidylinositol 5-phosphate 4-kinase type-2 beta OS=Mus musculus GN=Pip4k2b PE=1 SV=1
PI51A_MOUSE	Phosphatidylinositol 4-phosphate 5-kinase type-1 alpha OS=Mus musculus GN=Pip5k1a PE=1 SV=2
PI5L1_MOUSE	Phosphatidylinositol 4-phosphate 5-kinase-like protein 1 OS=Mus musculus GN=Pip5kl1 PE=1 SV=1
PIGN_MOUSE	GPI ethanolamine phosphate transferase 1 OS=Mus musculus GN=Pign PE=2 SV=2
PIM3_MOUSE	Serine/threonine-protein kinase pim-3 OS=Mus musculus GN=Pim3 PE=1 SV=1
PINK1_MOUSE	Serine/threonine-protein kinase PINK1, mitochondrial OS=Mus musculus GN=Pink1 PE=2 SV=2
PIPNB_MOUSE	Phosphatidylinositol transfer protein beta isoform OS=Mus musculus GN=Pitpnb PE=1 SV=2
PKHG2_MOUSE	Pleckstrin homology domain-containing family G member 2 OS=Mus musculus GN=Plekhg2 PE=2 SV=2
PKHO2_MOUSE	Pleckstrin homology domain-containing family O member 2 OS=Mus musculus GN=Plekho2 PE=1 SV=1
PKP4_MOUSE	Plakophilin-4 OS=Mus musculus GN=Pkp4 PE=1 SV=1
PLCB_MOUSE	1-acyl-sn-glycerol-3-phosphate acyltransferase beta OS=Mus musculus GN=Agpat2 PE=1 SV=1
PLCB1_MOUSE	1-phosphatidylinositol 4,5-bisphosphate phosphodiesterase beta-1 OS=Mus musculus GN=Plcb1 PE=1 SV=2
PLCL1_MOUSE	Inactive phospholipase C-like protein 1 OS=Mus musculus GN=Plcl1 PE=1 SV=3
PLCL2_MOUSE	Inactive phospholipase C-like protein 2 OS=Mus musculus GN=Plcl2 PE=1 SV=2
PLIN4_MOUSE	Perilipin-4 OS=Mus musculus GN=Plin4 PE=1 SV=2
PLK4_MOUSE	Serine/threonine-protein kinase PLK4 OS=Mus musculus GN=Plk4 PE=1 SV=2
PLPL2_MOUSE	Patatin-like phospholipase domain-containing protein 2 OS=Mus musculus GN=Pnpla2 PE=1 SV=1
PLXB1_MOUSE	Plexin-B1 OS=Mus musculus GN=Plxnb1 PE=1 SV=2
PMFBP_MOUSE	Polyamine-modulated factor 1-binding protein 1 OS=Mus musculus GN=Pmfbp1 PE=2 SV=1
PNO1_MOUSE	RNA-binding protein PNO1 OS=Mus musculus GN=Pno1 PE=1 SV=1
PNPT1_MOUSE	Polyribonucleotide nucleotidyltransferase 1, mitochondrial OS=Mus musculus GN=Pnpt1 PE=1 SV=1
POLK_MOUSE	DNA polymerase kappa OS=Mus musculus GN=Polk PE=1 SV=1
POMT2_MOUSE	Protein O-mannosyl-transferase 2 OS=Mus musculus GN=Pomt2 PE=1 SV=1
PP1R8_MOUSE	Nuclear inhibitor of protein phosphatase 1 OS=Mus musculus GN=Ppp1r8 PE=1 SV=1
PP6R1_MOUSE	Serine/threonine-protein phosphatase 6 regulatory subunit 1 OS=Mus musculus GN=Ppp6r1 PE=1 SV=1
PPDPF_MOUSE	Pancreatic progenitor cell differentiation and proliferation factor OS=Mus musculus GN=Ppdpf PE=1 SV=1
PPE2_MOUSE	Serine/threonine-protein phosphatase with EF-hands 2 OS=Mus musculus GN=Ppef2 PE=2 SV=1
PPIL1_MOUSE	Peptidyl-prolyl cis-trans isomerase-like 1 OS=Mus musculus GN=Ppil1 PE=1 SV=1
PPIP1_MOUSE	Proline-serine-threonine phosphatase-interacting protein 1 OS=Mus musculus GN=Pstpip1 PE=1 SV=1
PPM1A_MOUSE	Protein phosphatase 1A OS=Mus musculus GN=Ppm1a PE=1 SV=1
PPM1E_MOUSE	Protein phosphatase 1E OS=Mus musculus GN=Ppm1e PE=1 SV=2
PPME1_MOUSE	Protein phosphatase methylesterase 1 OS=Mus musculus GN=Ppme1 PE=1 SV=5
PPR18_MOUSE	Phostensin OS=Mus musculus GN=Ppp1r18 PE=1 SV=1
PPR32_MOUSE	Protein phosphatase 1 regulatory subunit 32 OS=Mus musculus GN=Ppp1r32 PE=1 SV=1
PQBP1_MOUSE	Polyglutamine-binding protein 1 OS=Mus musculus GN=Pqbp1 PE=1 SV=1
PR7B1_MOUSE	Prolactin-7B1 OS=Mus musculus GN=Prl7b1 PE=2 SV=2
PRC2A_MOUSE	Protein PRRC2A OS=Mus musculus GN=Prrc2a PE=1 SV=1
PRD10_MOUSE	PR domain zinc finger protein 10 OS=Mus musculus GN=Prdm10 PE=1 SV=2
PRELP_MOUSE	Prolargin OS=Mus musculus GN=Prelp PE=1 SV=2
PRP4B_MOUSE	Serine/threonine-protein kinase PRP4 homolog OS=Mus musculus GN=Prpf4b PE=1 SV=3
PRPK_MOUSE	TP53-regulating kinase OS=Mus musculus GN=Tp53rk PE=2 SV=1
PRR30_MOUSE	Proline-rich protein 30 OS=Mus musculus GN=Prr30 PE=2 SV=2
PRR33_MOUSE	Proline-rich protein 33 OS=Mus musculus GN=Prr33 PE=2 SV=1
PRS44_MOUSE	Serine protease 44 OS=Mus musculus GN=Prss44 PE=2 SV=1
PRS45_MOUSE	Inactive serine protease 45 OS=Mus musculus GN=Prss45 PE=2 SV=1
PRS52_MOUSE	Serine protease 52 OS=Mus musculus GN=Prss52 PE=2 SV=2
PRXD1_MOUSE	Prolyl-tRNA synthetase associated domain-containing protein 1 OS=Mus musculus GN=Prorsd1 PE=1 SV=1
PTEN_MOUSE	Phosphatidylinositol 3,4,5-trisphosphate 3-phosphatase and dual-specificity protein phosphatase PTEN OS=Mus musculus GN=Pten PE=1 SV=1
PTGIS_MOUSE	Prostacyclin synthase OS=Mus musculus GN=Ptgis PE=1 SV=1
PTMA_MOUSE	Prothymosin alpha OS=Mus musculus GN=Ptma PE=1 SV=2
PTMS_MOUSE	Parathymosin OS=Mus musculus GN=Ptms PE=1 SV=3
PTN2_MOUSE	Tyrosine-protein phosphatase non-receptor type 2 OS=Mus musculus GN=Ptpn2 PE=1 SV=2
PTN21_MOUSE	Tyrosine-protein phosphatase non-receptor type 21 OS=Mus musculus GN=Ptpn21 PE=1 SV=1
PTN5_MOUSE	Tyrosine-protein phosphatase non-receptor type 5 OS=Mus musculus GN=Ptpn5 PE=1 SV=2
PTN6_MOUSE	Tyrosine-protein phosphatase non-receptor type 6 OS=Mus musculus GN=Ptpn6 PE=1 SV=2
PTTG1_MOUSE	Securin OS=Mus musculus GN=Pttg1 PE=1 SV=1
PUM1_MOUSE	Pumilio homolog 1 OS=Mus musculus GN=Pum1 PE=1 SV=2
PUS7L_MOUSE	Pseudouridylate synthase 7 homolog-like protein OS=Mus musculus GN=Pus7l PE=1 SV=1
QCR10_MOUSE	Cytochrome b-c1 complex subunit 10 OS=Mus musculus GN=Uqcr11 PE=3 SV=1
QCR8_MOUSE	Cytochrome b-c1 complex subunit 8 OS=Mus musculus GN=Uqcrq PE=1 SV=3
R3HD2_MOUSE	R3H domain-containing protein 2 OS=Mus musculus GN=R3hdm2 PE=1 SV=2
R9BP_MOUSE	Regulator of G-protein signaling 9-binding protein OS=Mus musculus GN=Rgs9bp PE=1 SV=2
RAB15_MOUSE	Ras-related protein Rab-15 OS=Mus musculus GN=Rab15 PE=1 SV=1
RAB26_MOUSE	Ras-related protein Rab-26 OS=Mus musculus GN=Rab26 PE=1 SV=1
RAB5A_MOUSE	Ras-related protein Rab-5A OS=Mus musculus GN=Rab5a PE=1 SV=1
RABE2_MOUSE	Rab GTPase-binding effector protein 2 OS=Mus musculus GN=Rabep2 PE=1 SV=3
RABEK_MOUSE	Rab9 effector protein with kelch motifs OS=Mus musculus GN=Rabepk PE=1 SV=2
RAD51_MOUSE	DNA repair protein RAD51 homolog 1 OS=Mus musculus GN=Rad51 PE=1 SV=1
RAF1_MOUSE	RAF proto-oncogene serine/threonine-protein kinase OS=Mus musculus GN=Raf1 PE=1 SV=2
RAIN_MOUSE	Ras-interacting protein 1 OS=Mus musculus GN=Rasip1 PE=1 SV=3
RAP2B_MOUSE	Ras-related protein Rap-2b OS=Mus musculus GN=Rap2b PE=1 SV=1
RASF4_MOUSE	Ras association domain-containing protein 4 OS=Mus musculus GN=Rassf4 PE=1 SV=1
RASH_MOUSE	GTPase HRas OS=Mus musculus GN=Hras PE=1 SV=2
RASL1_MOUSE	RasGAP-activating-like protein 1 OS=Mus musculus GN=Rasal1 PE=1 SV=2
RB11A_MOUSE	Ras-related protein Rab-11A OS=Mus musculus GN=Rab11a PE=1 SV=3
RB22A_MOUSE	Ras-related protein Rab-22A OS=Mus musculus GN=Rab22a PE=1 SV=2
RB27A_MOUSE	Ras-related protein Rab-27A OS=Mus musculus GN=Rab27a PE=1 SV=1
RBGPR_MOUSE	Rab3 GTPase-activating protein non-catalytic subunit OS=Mus musculus GN=Rab3gap2 PE=1 SV=2
RBM14_MOUSE	RNA-binding protein 14 OS=Mus musculus GN=Rbm14 PE=1 SV=1
RBM3_MOUSE	RNA-binding protein 3 OS=Mus musculus GN=Rbm3 PE=1 SV=1
RBNS5_MOUSE	Rabenosyn-5 OS=Mus musculus GN=Rbsn PE=1 SV=1
RC3H1_MOUSE	Roquin-1 OS=Mus musculus GN=Rc3h1 PE=1 SV=1
RD21L_MOUSE	Double-strand-break repair protein rad21-like protein 1 OS=Mus musculus GN=Rad21l1 PE=1 SV=2
RECK_MOUSE	Reversion-inducing cysteine-rich protein with Kazal motifs OS=Mus musculus GN=Reck PE=1 SV=2
RERG_MOUSE	Ras-related and estrogen-regulated growth inhibitor OS=Mus musculus GN=Rerg PE=2 SV=1
RFFL_MOUSE	E3 ubiquitin-protein ligase rififylin OS=Mus musculus GN=Rffl PE=1 SV=1
RFIP5_MOUSE	Rab11 family-interacting protein 5 OS=Mus musculus GN=Rab11fip5 PE=1 SV=2
RHCG_MOUSE	Ammonium transporter Rh type C OS=Mus musculus GN=Rhcg PE=1 SV=2
RHEB_MOUSE	GTP-binding protein Rheb OS=Mus musculus GN=Rheb PE=1 SV=1
RHG05_MOUSE	Rho GTPase-activating protein 5 OS=Mus musculus GN=Arhgap5 PE=1 SV=2
RHG08_MOUSE	Rho GTPase-activating protein 8 OS=Mus musculus GN=Arhgap8 PE=2 SV=3
RHG12_MOUSE	Rho GTPase-activating protein 12 OS=Mus musculus GN=Arhgap12 PE=1 SV=2
RHG17_MOUSE	Rho GTPase-activating protein 17 OS=Mus musculus GN=Arhgap17 PE=1 SV=1
RHG18_MOUSE	Rho GTPase-activating protein 18 OS=Mus musculus GN=Arhgap18 PE=1 SV=1
RHG21_MOUSE	Rho GTPase-activating protein 21 OS=Mus musculus GN=Arhgap21 PE=1 SV=1
RHG42_MOUSE	Rho GTPase-activating protein 42 OS=Mus musculus GN=Arhgap42 PE=1 SV=1
RIMS4_MOUSE	Regulating synaptic membrane exocytosis protein 4 OS=Mus musculus GN=Rims4 PE=1 SV=1
RINL_MOUSE	Ras and Rab interactor-like protein OS=Mus musculus GN=Rinl PE=1 SV=1
RK_MOUSE	Rhodopsin kinase OS=Mus musculus GN=Grk1 PE=1 SV=1
RL17_MOUSE	60S ribosomal protein L17 OS=Mus musculus GN=Rpl17 PE=1 SV=3
RL22L_MOUSE	60S ribosomal protein L22-like 1 OS=Mus musculus GN=Rpl22l1 PE=1 SV=1
RL26_MOUSE	60S ribosomal protein L26 OS=Mus musculus GN=Rpl26 PE=1 SV=1
RL37A_MOUSE	60S ribosomal protein L37a OS=Mus musculus GN=Rpl37a PE=1 SV=2
RL38_MOUSE	60S ribosomal protein L38 OS=Mus musculus GN=Rpl38 PE=1 SV=3
RM50_MOUSE	39S ribosomal protein L50, mitochondrial OS=Mus musculus GN=Mrpl50 PE=1 SV=2
RMD2_MOUSE	Regulator of microtubule dynamics protein 2 OS=Mus musculus GN=Rmdn2 PE=1 SV=1
RN111_MOUSE	E3 ubiquitin-protein ligase Arkadia OS=Mus musculus GN=Rnf111 PE=1 SV=1
RN123_MOUSE	E3 ubiquitin-protein ligase RNF123 OS=Mus musculus GN=Rnf123 PE=1 SV=1
RN19A_MOUSE	E3 ubiquitin-protein ligase RNF19A OS=Mus musculus GN=Rnf19a PE=1 SV=2
RN213_MOUSE	E3 ubiquitin-protein ligase RNF213 OS=Mus musculus GN=Rnf213 PE=1 SV=1
RN217_MOUSE	Probable E3 ubiquitin-protein ligase RNF217 OS=Mus musculus GN=Rnf217 PE=3 SV=2
RNZ2_MOUSE	Zinc phosphodiesterase ELAC protein 2 OS=Mus musculus GN=Elac2 PE=1 SV=1
RO60_MOUSE	60 kDa SS-A/Ro ribonucleoprotein OS=Mus musculus GN=Trove2 PE=1 SV=1
ROCK2_MOUSE	Rho-associated protein kinase 2 OS=Mus musculus GN=Rock2 PE=1 SV=1
ROR1_MOUSE	Tyrosine-protein kinase transmembrane receptor ROR1 OS=Mus musculus GN=Ror1 PE=2 SV=2
RP1_MOUSE	Oxygen-regulated protein 1 OS=Mus musculus GN=Rp1 PE=1 SV=2
RPA2_MOUSE	DNA-directed RNA polymerase I subunit RPA2 OS=Mus musculus GN=Polr1b PE=1 SV=2
RPGF2_MOUSE	Rap guanine nucleotide exchange factor 2 OS=Mus musculus GN=Rapgef2 PE=1 SV=2
RPGR_MOUSE	X-linked retinitis pigmentosa GTPase regulator OS=Mus musculus GN=Rpgr PE=1 SV=2
RS27_MOUSE	40S ribosomal protein S27 OS=Mus musculus GN=Rps27 PE=1 SV=3
RS27L_MOUSE	40S ribosomal protein S27-like OS=Mus musculus GN=Rps27l PE=1 SV=3
RS30_MOUSE	40S ribosomal protein S30 OS=Mus musculus GN=Fau PE=1 SV=1
RSPO2_MOUSE	R-spondin-2 OS=Mus musculus GN=Rspo2 PE=1 SV=1
RSPRY_MOUSE	RING finger and SPRY domain-containing protein 1 OS=Mus musculus GN=Rspry1 PE=1 SV=1
RUBIC_MOUSE	Run domain Beclin-1 interacting and cysteine-rich containing protein OS=Mus musculus GN=Kiaa0226 PE=1 SV=2
RUSC2_MOUSE	Iporin OS=Mus musculus GN=Rusc2 PE=1 SV=2
S10A1_MOUSE	Protein S100-A1 OS=Mus musculus GN=S100a1 PE=1 SV=2
S10A6_MOUSE	Protein S100-A6 OS=Mus musculus GN=S100a6 PE=1 SV=3
S10AB_MOUSE	Protein S100-A11 OS=Mus musculus GN=S100a11 PE=1 SV=1
S10AD_MOUSE	Protein S100-A13 OS=Mus musculus GN=S100a13 PE=1 SV=1
S19A1_MOUSE	Folate transporter 1 OS=Mus musculus GN=Slc19a1 PE=1 SV=1
S22AG_MOUSE	Solute carrier family 22 member 16 OS=Mus musculus GN=Slc22a16 PE=2 SV=1
S26A8_MOUSE	Testis anion transporter 1 OS=Mus musculus GN=Slc26a8 PE=2 SV=2
S38A2_MOUSE	Sodium-coupled neutral amino acid transporter 2 OS=Mus musculus GN=Slc38a2 PE=1 SV=1
S38AB_MOUSE	Putative sodium-coupled neutral amino acid transporter 11 OS=Mus musculus GN=Slc38a11 PE=2 SV=2
S45A3_MOUSE	Solute carrier family 45 member 3 OS=Mus musculus GN=Slc45a3 PE=2 SV=1
SAMD8_MOUSE	Sphingomyelin synthase-related protein 1 OS=Mus musculus GN=Samd8 PE=2 SV=1
SAS6_MOUSE	Spindle assembly abnormal protein 6 homolog OS=Mus musculus GN=Sass6 PE=2 SV=2
SASH3_MOUSE	SAM and SH3 domain-containing protein 3 OS=Mus musculus GN=Sash3 PE=1 SV=2
SC11C_MOUSE	Signal peptidase complex catalytic subunit SEC11C OS=Mus musculus GN=Sec11c PE=1 SV=3
SC22A_MOUSE	Vesicle-trafficking protein SEC22a OS=Mus musculus GN=Sec22a PE=2 SV=1
SC5A1_MOUSE	Sodium/glucose cotransporter 1 OS=Mus musculus GN=Slc5a1 PE=1 SV=1
SCAM4_MOUSE	Secretory carrier-associated membrane protein 4 OS=Mus musculus GN=Scamp4 PE=1 SV=1
SCMC1_MOUSE	Calcium-binding mitochondrial carrier protein SCaMC-1 OS=Mus musculus GN=Slc25a24 PE=1 SV=1
SCML4_MOUSE	Sex comb on midleg-like protein 4 OS=Mus musculus GN=Scml4 PE=1 SV=2
SCN5A_MOUSE	Sodium channel protein type 5 subunit alpha OS=Mus musculus GN=Scn5a PE=1 SV=2
SCO2_MOUSE	Protein SCO2 homolog, mitochondrial OS=Mus musculus GN=Sco2 PE=1 SV=1
SDC4_MOUSE	Syndecan-4 OS=Mus musculus GN=Sdc4 PE=1 SV=1
SDCG3_MOUSE	Serologically defined colon cancer antigen 3 homolog OS=Mus musculus GN=Sdccag3 PE=1 SV=1
SDCG8_MOUSE	Serologically defined colon cancer antigen 8 homolog OS=Mus musculus GN=Sdccag8 PE=1 SV=1
SDHF1_MOUSE	Succinate dehydrogenase assembly factor 1, mitochondrial OS=Mus musculus GN=Sdhaf1 PE=1 SV=1
SELW_MOUSE	Selenoprotein W OS=Mus musculus GN=Sepw1 PE=1 SV=3
SEM3B_MOUSE	Semaphorin-3B OS=Mus musculus GN=Sema3b PE=2 SV=2
SENP8_MOUSE	Sentrin-specific protease 8 OS=Mus musculus GN=Senp8 PE=1 SV=2
SEP15_MOUSE	15 kDa selenoprotein OS=Mus musculus GN=Sep15 PE=1 SV=3
SETD5_MOUSE	SET domain-containing protein 5 OS=Mus musculus GN=Setd5 PE=1 SV=2
SFRP3_MOUSE	Secreted frizzled-related protein 3 OS=Mus musculus GN=Frzb PE=1 SV=1
SGIP1_MOUSE	SH3-containing GRB2-like protein 3-interacting protein 1 OS=Mus musculus GN=Sgip1 PE=1 SV=1
SGOL1_MOUSE	Shugoshin-like 1 OS=Mus musculus GN=Sgol1 PE=2 SV=1
SGSM3_MOUSE	Small G protein signaling modulator 3 OS=Mus musculus GN=Sgsm3 PE=1 SV=1
SHOT1_MOUSE	Shootin-1 OS=Mus musculus GN=Shtn1 PE=1 SV=1
SHPRH_MOUSE	E3 ubiquitin-protein ligase SHPRH OS=Mus musculus GN=Shprh PE=1 SV=1
SI1L1_MOUSE	Signal-induced proliferation-associated 1-like protein 1 OS=Mus musculus GN=Sipa1l1 PE=1 SV=2
SIA1A_MOUSE	E3 ubiquitin-protein ligase SIAH1A OS=Mus musculus GN=Siah1a PE=1 SV=1
SIM24_MOUSE	Small integral membrane protein 24 OS=Mus musculus GN=Smim24 PE=1 SV=1
SKIL_MOUSE	Ski-like protein OS=Mus musculus GN=Skil PE=2 SV=2
SKIT5_MOUSE	Selection and upkeep of intraepithelial T-cells protein 5 OS=Mus musculus GN=Skint5 PE=2 SV=1
SKIT6_MOUSE	Selection and upkeep of intraepithelial T-cells protein 6 OS=Mus musculus GN=Skint6 PE=2 SV=1
SKT_MOUSE	Sickle tail protein OS=Mus musculus GN=Skt PE=1 SV=1
SL9A1_MOUSE	Sodium/hydrogen exchanger 1 OS=Mus musculus GN=Slc9a1 PE=1 SV=1
SLMO2_MOUSE	Protein slowmo homolog 2 OS=Mus musculus GN=Slmo2 PE=1 SV=2
SLX4_MOUSE	Structure-specific endonuclease subunit SLX4 OS=Mus musculus GN=Slx4 PE=1 SV=1
SMAD2_MOUSE	Mothers against decapentaplegic homolog 2 OS=Mus musculus GN=Smad2 PE=1 SV=2
SMOK1_MOUSE	Sperm motility kinase 1 OS=Mus musculus GN=Smok1 PE=2 SV=1
SNPC4_MOUSE	snRNA-activating protein complex subunit 4 OS=Mus musculus GN=Snapc4 PE=1 SV=2
SNRK_MOUSE	SNF-related serine/threonine-protein kinase OS=Mus musculus GN=Snrk PE=1 SV=1
SNX12_MOUSE	Sorting nexin-12 OS=Mus musculus GN=Snx12 PE=1 SV=1
SNX3_MOUSE	Sorting nexin-3 OS=Mus musculus GN=Snx3 PE=1 SV=3
SNX9_MOUSE	Sorting nexin-9 OS=Mus musculus GN=Snx9 PE=1 SV=1
SOAT1_MOUSE	Sterol O-acyltransferase 1 OS=Mus musculus GN=Soat1 PE=1 SV=2
SOCS2_MOUSE	Suppressor of cytokine signaling 2 OS=Mus musculus GN=Socs2 PE=2 SV=1
SOGA1_MOUSE	Protein SOGA1 OS=Mus musculus GN=Soga1 PE=1 SV=3
SOGA3_MOUSE	Protein SOGA3 OS=Mus musculus GN=Soga3 PE=1 SV=2
SORCN_MOUSE	Sorcin OS=Mus musculus GN=Sri PE=1 SV=1
SOX18_MOUSE	Transcription factor SOX-18 OS=Mus musculus GN=Sox18 PE=1 SV=3
SPA3M_MOUSE	Serine protease inhibitor A3M OS=Mus musculus GN=Serpina3m PE=1 SV=2
SPEG_MOUSE	Striated muscle-specific serine/threonine-protein kinase OS=Mus musculus GN=Speg PE=1 SV=2
SPF30_MOUSE	Survival of motor neuron-related-splicing factor 30 OS=Mus musculus GN=Smndc1 PE=1 SV=1
SPG20_MOUSE	Spartin OS=Mus musculus GN=Spg20 PE=1 SV=1
SPT16_MOUSE	Spermatogenesis-associated protein 16 OS=Mus musculus GN=Spata16 PE=2 SV=1
SPT17_MOUSE	Spermatogenesis-associated protein 17 OS=Mus musculus GN=Spata17 PE=2 SV=1
SPT32_MOUSE	Spermatogenesis-associated protein 32 OS=Mus musculus GN=Spata32 PE=1 SV=1
SPTCS_MOUSE	Spatacsin OS=Mus musculus GN=Spg11 PE=1 SV=3
SRBS1_MOUSE	Sorbin and SH3 domain-containing protein 1 OS=Mus musculus GN=Sorbs1 PE=1 SV=2
SRBS2_MOUSE	Sorbin and SH3 domain-containing protein 2 OS=Mus musculus GN=Sorbs2 PE=1 SV=2
SRPX2_MOUSE	Sushi repeat-containing protein SRPX2 OS=Mus musculus GN=Srpx2 PE=1 SV=2
SSNA1_MOUSE	Sjoegren syndrome nuclear autoantigen 1 homolog OS=Mus musculus GN=Ssna1 PE=1 SV=1
ST6B1_MOUSE	Sulfotransferase 6B1 OS=Mus musculus GN=Sult6b1 PE=1 SV=1
STAB2_MOUSE	Stabilin-2 OS=Mus musculus GN=Stab2 PE=1 SV=1
STAG1_MOUSE	Cohesin subunit SA-1 OS=Mus musculus GN=Stag1 PE=1 SV=3
STAR6_MOUSE	StAR-related lipid transfer protein 6 OS=Mus musculus GN=Stard6 PE=2 SV=1
STAR8_MOUSE	StAR-related lipid transfer protein 8 OS=Mus musculus GN=Stard8 PE=1 SV=2
STK10_MOUSE	Serine/threonine-protein kinase 10 OS=Mus musculus GN=Stk10 PE=1 SV=2
STK31_MOUSE	Serine/threonine-protein kinase 31 OS=Mus musculus GN=Stk31 PE=1 SV=2
STK36_MOUSE	Serine/threonine-protein kinase 36 OS=Mus musculus GN=Stk36 PE=1 SV=3
STK4_MOUSE	Serine/threonine-protein kinase 4 OS=Mus musculus GN=Stk4 PE=1 SV=1
STPAP_MOUSE	Speckle targeted PIP5K1A-regulated poly(A) polymerase OS=Mus musculus GN=Tut1 PE=1 SV=1
STRAA_MOUSE	STE20-related kinase adapter protein alpha OS=Mus musculus GN=Strada PE=1 SV=1
STRBP_MOUSE	Spermatid perinuclear RNA-binding protein OS=Mus musculus GN=Strbp PE=1 SV=1
STX2_MOUSE	Syntaxin-2 OS=Mus musculus GN=Stx2 PE=1 SV=1
STXB1_MOUSE	Syntaxin-binding protein 1 OS=Mus musculus GN=Stxbp1 PE=1 SV=2
STXB2_MOUSE	Syntaxin-binding protein 2 OS=Mus musculus GN=Stxbp2 PE=1 SV=1
STXB5_MOUSE	Syntaxin-binding protein 5 OS=Mus musculus GN=Stxbp5 PE=1 SV=3
SUGP2_MOUSE	SURP and G-patch domain-containing protein 2 OS=Mus musculus GN=Sugp2 PE=1 SV=2
SURF6_MOUSE	Surfeit locus protein 6 OS=Mus musculus GN=Surf6 PE=1 SV=1
SVOPL_MOUSE	Putative transporter SVOPL OS=Mus musculus GN=Svopl PE=2 SV=1
SYBU_MOUSE	Syntabulin OS=Mus musculus GN=Sybu PE=1 SV=1
SYF1_MOUSE	Pre-mRNA-splicing factor SYF1 OS=Mus musculus GN=Xab2 PE=1 SV=1
SYNDE_MOUSE	Syndetin OS=Mus musculus GN=Ccdc132 PE=1 SV=2
SYNJ1_MOUSE	Synaptojanin-1 OS=Mus musculus GN=Synj1 PE=1 SV=3
SYNM_MOUSE	Probable asparagine--tRNA ligase, mitochondrial OS=Mus musculus GN=Nars2 PE=1 SV=1
SYNP2_MOUSE	Synaptopodin-2 OS=Mus musculus GN=Synpo2 PE=1 SV=2
SYT2_MOUSE	Synaptotagmin-2 OS=Mus musculus GN=Syt2 PE=1 SV=1
SYTC_MOUSE	Threonine--tRNA ligase, cytoplasmic OS=Mus musculus GN=Tars PE=1 SV=2
SYTL3_MOUSE	Synaptotagmin-like protein 3 OS=Mus musculus GN=Sytl3 PE=1 SV=2
SYUG_MOUSE	Gamma-synuclein OS=Mus musculus GN=Sncg PE=1 SV=1
SZT2_MOUSE	Protein SZT2 OS=Mus musculus GN=Szt2 PE=1 SV=1
T120B_MOUSE	Transmembrane protein 120B OS=Mus musculus GN=Tmem120b PE=2 SV=1
T126A_MOUSE	Transmembrane protein 126A OS=Mus musculus GN=Tmem126a PE=1 SV=1
T132A_MOUSE	Transmembrane protein 132A OS=Mus musculus GN=Tmem132a PE=1 SV=2
T132E_MOUSE	Transmembrane protein 132E OS=Mus musculus GN=Tmem132e PE=1 SV=1
T151A_MOUSE	Transmembrane protein 151A OS=Mus musculus GN=Tmem151a PE=1 SV=1
T22D1_MOUSE	TSC22 domain family protein 1 OS=Mus musculus GN=Tsc22d1 PE=1 SV=2
T3JAM_MOUSE	TRAF3-interacting JNK-activating modulator OS=Mus musculus GN=Traf3ip3 PE=1 SV=2
TACC2_MOUSE	Transforming acidic coiled-coil-containing protein 2 OS=Mus musculus GN=Tacc2 PE=1 SV=2
TAF5_MOUSE	Transcription initiation factor TFIID subunit 5 OS=Mus musculus GN=Taf5 PE=1 SV=1
TAM41_MOUSE	Phosphatidate cytidylyltransferase, mitochondrial OS=Mus musculus GN=Tamm41 PE=1 SV=2
TAOK1_MOUSE	Serine/threonine-protein kinase TAO1 OS=Mus musculus GN=Taok1 PE=1 SV=1
TAOK2_MOUSE	Serine/threonine-protein kinase TAO2 OS=Mus musculus GN=Taok2 PE=1 SV=3
TARA_MOUSE	TRIO and F-actin-binding protein OS=Mus musculus GN=Triobp PE=1 SV=3
TASOR_MOUSE	Protein TASOR OS=Mus musculus GN=Fam208a PE=1 SV=2
TBA1C_MOUSE	Tubulin alpha-1C chain OS=Mus musculus GN=Tuba1c PE=1 SV=1
TBB6_MOUSE	Tubulin beta-6 chain OS=Mus musculus GN=Tubb6 PE=1 SV=1
TBC12_MOUSE	TBC1 domain family member 12 OS=Mus musculus GN=Tbc1d12 PE=1 SV=2
TBCA_MOUSE	Tubulin-specific chaperone A OS=Mus musculus GN=Tbca PE=1 SV=3
TBK1_MOUSE	Serine/threonine-protein kinase TBK1 OS=Mus musculus GN=Tbk1 PE=1 SV=1
TBPL1_MOUSE	TATA box-binding protein-like protein 1 OS=Mus musculus GN=Tbpl1 PE=1 SV=1
TCHP_MOUSE	Trichoplein keratin filament-binding protein OS=Mus musculus GN=Tchp PE=1 SV=2
TCPR1_MOUSE	Tectonin beta-propeller repeat-containing protein 1 OS=Mus musculus GN=Tecpr1 PE=1 SV=1
TDRKH_MOUSE	Tudor and KH domain-containing protein OS=Mus musculus GN=Tdrkh PE=1 SV=1
TEKT1_MOUSE	Tektin-1 OS=Mus musculus GN=Tekt1 PE=1 SV=1
TEN2_MOUSE	Teneurin-2 OS=Mus musculus GN=Tenm2 PE=1 SV=1
TEX11_MOUSE	Testis-expressed sequence 11 protein OS=Mus musculus GN=Tex11 PE=1 SV=1
TEX14_MOUSE	Inactive serine/threonine-protein kinase TEX14 OS=Mus musculus GN=Tex14 PE=1 SV=2
TF3B_MOUSE	Transcription factor IIIB 90 kDa subunit OS=Mus musculus GN=Brf1 PE=1 SV=1
TF3C4_MOUSE	General transcription factor 3C polypeptide 4 OS=Mus musculus GN=Gtf3c4 PE=1 SV=2
TF3C5_MOUSE	General transcription factor 3C polypeptide 5 OS=Mus musculus GN=Gtf3c5 PE=2 SV=2
TGM3_MOUSE	Protein-glutamine gamma-glutamyltransferase E OS=Mus musculus GN=Tgm3 PE=1 SV=2
THAP3_MOUSE	THAP domain-containing protein 3 OS=Mus musculus GN=Thap3 PE=2 SV=1
THEG_MOUSE	Testicular haploid expressed gene protein OS=Mus musculus GN=Theg PE=1 SV=1
THEGL_MOUSE	Testicular haploid expressed gene protein-like OS=Mus musculus GN=Thegl PE=2 SV=1
THIOM_MOUSE	Thioredoxin, mitochondrial OS=Mus musculus GN=Txn2 PE=1 SV=1
THMS1_MOUSE	Protein THEMIS OS=Mus musculus GN=Themis PE=1 SV=1
THSD1_MOUSE	Thrombospondin type-1 domain-containing protein 1 OS=Mus musculus GN=Thsd1 PE=1 SV=2
TI8AB_MOUSE	Putative mitochondrial import inner membrane translocase subunit Tim8 A-B OS=Mus musculus GN=Timm8a2 PE=3 SV=1
TIF1A_MOUSE	Transcription intermediary factor 1-alpha OS=Mus musculus GN=Trim24 PE=1 SV=1
TILB_MOUSE	Protein tilB homolog OS=Mus musculus GN=Lrrc6 PE=1 SV=1
TIM14_MOUSE	Mitochondrial import inner membrane translocase subunit TIM14 OS=Mus musculus GN=Dnajc19 PE=3 SV=3
TIM16_MOUSE	Mitochondrial import inner membrane translocase subunit TIM16 OS=Mus musculus GN=Pam16 PE=1 SV=1
TIM22_MOUSE	Mitochondrial import inner membrane translocase subunit Tim22 OS=Mus musculus GN=Timm22 PE=1 SV=1
TIP_MOUSE	T-cell immunomodulatory protein OS=Mus musculus GN=Itfg1 PE=1 SV=2
TIP39_MOUSE	Tuberoinfundibular peptide of 39 residues OS=Mus musculus GN=Pth2 PE=1 SV=1
TLX3_MOUSE	T-cell leukemia homeobox protein 3 OS=Mus musculus GN=Tlx3 PE=2 SV=2
TM177_MOUSE	Transmembrane protein 177 OS=Mus musculus GN=Tmem177 PE=1 SV=1
TM190_MOUSE	Transmembrane protein 190 OS=Mus musculus GN=Tmem190 PE=1 SV=1
TMC1_MOUSE	Transmembrane channel-like protein 1 OS=Mus musculus GN=Tmc1 PE=1 SV=1
TMCC1_MOUSE	Transmembrane and coiled-coil domains protein 1 OS=Mus musculus GN=Tmcc1 PE=1 SV=2
TMCC2_MOUSE	Transmembrane and coiled-coil domains protein 2 OS=Mus musculus GN=Tmcc2 PE=1 SV=1
TMG3_MOUSE	Transmembrane gamma-carboxyglutamic acid protein 3 OS=Mus musculus GN=Prrg3 PE=2 SV=2
TMM11_MOUSE	Transmembrane protein 11, mitochondrial OS=Mus musculus GN=Tmem11 PE=1 SV=1
TMM95_MOUSE	Transmembrane protein 95 OS=Mus musculus GN=Tmem95 PE=2 SV=1
TNIP1_MOUSE	TNFAIP3-interacting protein 1 OS=Mus musculus GN=Tnip1 PE=1 SV=1
TNKS1_MOUSE	Tankyrase-1 OS=Mus musculus GN=Tnks PE=1 SV=1
TNPO1_MOUSE	Transportin-1 OS=Mus musculus GN=Tnpo1 PE=1 SV=2
TOPZ1_MOUSE	Testis- and ovary-specific PAZ domain-containing protein 1 OS=Mus musculus GN=Topaz1 PE=2 SV=1
TPA_MOUSE	Tissue-type plasminogen activator OS=Mus musculus GN=Plat PE=1 SV=3
TPC2L_MOUSE	Trafficking protein particle complex subunit 2-like protein OS=Mus musculus GN=Trappc2l PE=1 SV=1
TPPC3_MOUSE	Trafficking protein particle complex subunit 3 OS=Mus musculus GN=Trappc3 PE=1 SV=1
TPPC9_MOUSE	Trafficking protein particle complex subunit 9 OS=Mus musculus GN=Trappc9 PE=1 SV=2
TPPP3_MOUSE	Tubulin polymerization-promoting protein family member 3 OS=Mus musculus GN=Tppp3 PE=1 SV=1
TR43C_MOUSE	Tripartite motif-containing protein 43C OS=Mus musculus GN=Trim43c PE=2 SV=1
TRAF4_MOUSE	TNF receptor-associated factor 4 OS=Mus musculus GN=Traf4 PE=1 SV=2
TRAF6_MOUSE	TNF receptor-associated factor 6 OS=Mus musculus GN=Traf6 PE=1 SV=2
TRI10_MOUSE	Tripartite motif-containing protein 10 OS=Mus musculus GN=Trim10 PE=2 SV=2
TRI50_MOUSE	E3 ubiquitin-protein ligase TRIM50 OS=Mus musculus GN=Trim50 PE=2 SV=1
TRIM6_MOUSE	Tripartite motif-containing protein 6 OS=Mus musculus GN=Trim6 PE=1 SV=1
TRIM9_MOUSE	E3 ubiquitin-protein ligase TRIM9 OS=Mus musculus GN=Trim9 PE=1 SV=2
TRM1L_MOUSE	TRMT1-like protein OS=Mus musculus GN=Trmt1l PE=1 SV=1
TRNK1_MOUSE	TPR and ankyrin repeat-containing protein 1 OS=Mus musculus GN=Trank1 PE=2 SV=3
TRPC2_MOUSE	Short transient receptor potential channel 2 OS=Mus musculus GN=Trpc2 PE=2 SV=2
TRPC3_MOUSE	Short transient receptor potential channel 3 OS=Mus musculus GN=Trpc3 PE=2 SV=1
TRPM1_MOUSE	Transient receptor potential cation channel subfamily M member 1 OS=Mus musculus GN=Trpm1 PE=2 SV=2
TRPV3_MOUSE	Transient receptor potential cation channel subfamily V member 3 OS=Mus musculus GN=Trpv3 PE=1 SV=2
TRPV5_MOUSE	Transient receptor potential cation channel subfamily V member 5 OS=Mus musculus GN=Trpv5 PE=1 SV=2
TSP1_MOUSE	Thrombospondin-1 OS=Mus musculus GN=Thbs1 PE=1 SV=1
TT21B_MOUSE	Tetratricopeptide repeat protein 21B OS=Mus musculus GN=Ttc21b PE=1 SV=1
TT23L_MOUSE	Tetratricopeptide repeat protein 23-like OS=Mus musculus GN=Ttc23l PE=2 SV=1
TTL12_MOUSE	Tubulin--tyrosine ligase-like protein 12 OS=Mus musculus GN=Ttll12 PE=1 SV=1
TTL13_MOUSE	Tubulin polyglutamylase TTLL13 OS=Mus musculus GN=Ttll13 PE=2 SV=1
TTLL3_MOUSE	Tubulin monoglycylase TTLL3 OS=Mus musculus GN=Ttll3 PE=1 SV=1
TTLL5_MOUSE	Tubulin polyglutamylase TTLL5 OS=Mus musculus GN=Ttll5 PE=2 SV=3
TUB_MOUSE	Tubby protein OS=Mus musculus GN=Tub PE=1 SV=1
TVA3_MOUSE	T-cell receptor alpha chain V region CTL-F3 OS=Mus musculus PE=1 SV=1
TXD17_MOUSE	Thioredoxin domain-containing protein 17 OS=Mus musculus GN=Txndc17 PE=1 SV=1
TXND8_MOUSE	Thioredoxin domain-containing protein 8 OS=Mus musculus GN=Txndc8 PE=1 SV=1
TY3H_MOUSE	Tyrosine 3-monooxygenase OS=Mus musculus GN=Th PE=1 SV=3
TYW3_MOUSE	tRNA wybutosine-synthesizing protein 3 homolog OS=Mus musculus GN=Tyw3 PE=1 SV=1
U1SBP_MOUSE	U11/U12 small nuclear ribonucleoprotein 35 kDa protein OS=Mus musculus GN=Snrnp35 PE=2 SV=1
UB2D2_MOUSE	Ubiquitin-conjugating enzyme E2 D2 OS=Mus musculus GN=Ube2d2 PE=1 SV=1
UB2L3_MOUSE	Ubiquitin-conjugating enzyme E2 L3 OS=Mus musculus GN=Ube2l3 PE=1 SV=1
UBA1Y_MOUSE	Ubiquitin-like modifier-activating enzyme 1 Y OS=Mus musculus GN=Uba1y PE=1 SV=2
UBA3_MOUSE	NEDD8-activating enzyme E1 catalytic subunit OS=Mus musculus GN=Uba3 PE=1 SV=2
UBL4B_MOUSE	Ubiquitin-like protein 4B OS=Mus musculus GN=Ubl4b PE=2 SV=1
UBP24_MOUSE	Ubiquitin carboxyl-terminal hydrolase 24 OS=Mus musculus GN=Usp24 PE=1 SV=1
UBP4_MOUSE	Ubiquitin carboxyl-terminal hydrolase 4 OS=Mus musculus GN=Usp4 PE=1 SV=3
UBP43_MOUSE	Ubiquitin carboxyl-terminal hydrolase 43 OS=Mus musculus GN=Usp43 PE=1 SV=2
UBTD1_MOUSE	Ubiquitin domain-containing protein 1 OS=Mus musculus GN=Ubtd1 PE=2 SV=1
UBXN8_MOUSE	UBX domain-containing protein 8 OS=Mus musculus GN=Ubxn8 PE=1 SV=1
UCHL5_MOUSE	Ubiquitin carboxyl-terminal hydrolase isozyme L5 OS=Mus musculus GN=Uchl5 PE=1 SV=2
UCN1_MOUSE	Urocortin OS=Mus musculus GN=Ucn PE=1 SV=1
UD3A2_MOUSE	UDP-glucuronosyltransferase 3A2 OS=Mus musculus GN=Ugt3a2 PE=1 SV=2
UGDH_MOUSE	UDP-glucose 6-dehydrogenase OS=Mus musculus GN=Ugdh PE=1 SV=1
ULK4_MOUSE	Serine/threonine-protein kinase ULK4 OS=Mus musculus GN=Ulk4 PE=1 SV=2
UNC5C_MOUSE	Netrin receptor UNC5C OS=Mus musculus GN=Unc5c PE=1 SV=1
UNC79_MOUSE	Protein unc-79 homolog OS=Mus musculus GN=Unc79 PE=1 SV=1
UPP_MOUSE	Uracil phosphoribosyltransferase homolog OS=Mus musculus GN=Uprt PE=1 SV=1
UQCC2_MOUSE	Ubiquinol-cytochrome-c reductase complex assembly factor 2 OS=Mus musculus GN=Uqcc2 PE=1 SV=1
USH1C_MOUSE	Harmonin OS=Mus musculus GN=Ush1c PE=1 SV=1
UST_MOUSE	Uronyl 2-sulfotransferase OS=Mus musculus GN=Ust PE=2 SV=3
UT14A_MOUSE	U3 small nucleolar RNA-associated protein 14 homolog A OS=Mus musculus GN=Utp14a PE=1 SV=1
UT14B_MOUSE	U3 small nucleolar RNA-associated protein 14 homolog B OS=Mus musculus GN=Utp14b PE=1 SV=2
UTP18_MOUSE	U3 small nucleolar RNA-associated protein 18 homolog OS=Mus musculus GN=Utp18 PE=1 SV=1
UTP20_MOUSE	Small subunit processome component 20 homolog OS=Mus musculus GN=Utp20 PE=1 SV=2
V2116_MOUSE	Vomeronasal type-2 receptor 116 OS=Mus musculus GN=Vmn2r116 PE=1 SV=1
VANG1_MOUSE	Vang-like protein 1 OS=Mus musculus GN=Vangl1 PE=1 SV=2
VATF_MOUSE	V-type proton ATPase subunit F OS=Mus musculus GN=Atp6v1f PE=1 SV=2
VISL1_MOUSE	Visinin-like protein 1 OS=Mus musculus GN=Vsnl1 PE=1 SV=2
VMA21_MOUSE	Vacuolar ATPase assembly integral membrane protein Vma21 OS=Mus musculus GN=Vma21 PE=1 SV=1
VMA5A_MOUSE	von Willebrand factor A domain-containing protein 5A OS=Mus musculus GN=Vwa5a PE=1 SV=2
VP13B_MOUSE	Vacuolar protein sorting-associated protein 13B OS=Mus musculus GN=Vps13b PE=1 SV=2
VPS16_MOUSE	Vacuolar protein sorting-associated protein 16 homolog OS=Mus musculus GN=Vps16 PE=1 SV=3
VPS18_MOUSE	Vacuolar protein sorting-associated protein 18 homolog OS=Mus musculus GN=Vps18 PE=1 SV=2
VPS25_MOUSE	Vacuolar protein-sorting-associated protein 25 OS=Mus musculus GN=Vps25 PE=1 SV=1
VPS52_MOUSE	Vacuolar protein sorting-associated protein 52 homolog OS=Mus musculus GN=Vps52 PE=1 SV=1
VPS72_MOUSE	Vacuolar protein sorting-associated protein 72 homolog OS=Mus musculus GN=Vps72 PE=2 SV=2
VPS8_MOUSE	Vacuolar protein sorting-associated protein 8 homolog OS=Mus musculus GN=Vps8 PE=1 SV=1
VW5B1_MOUSE	von Willebrand factor A domain-containing protein 5B1 OS=Mus musculus GN=Vwa5b1 PE=2 SV=1
VWF_MOUSE	von Willebrand factor OS=Mus musculus GN=Vwf PE=1 SV=2
WBP2L_MOUSE	Postacrosomal sheath WW domain-binding protein OS=Mus musculus GN=Wbp2nl PE=2 SV=1
WDFY3_MOUSE	WD repeat and FYVE domain-containing protein 3 OS=Mus musculus GN=Wdfy3 PE=1 SV=1
WDR13_MOUSE	WD repeat-containing protein 13 OS=Mus musculus GN=Wdr13 PE=1 SV=1
WDR19_MOUSE	WD repeat-containing protein 19 OS=Mus musculus GN=Wdr19 PE=1 SV=1
WDR24_MOUSE	WD repeat-containing protein 24 OS=Mus musculus GN=Wdr24 PE=1 SV=1
WDR25_MOUSE	WD repeat-containing protein 25 OS=Mus musculus GN=Wdr25 PE=2 SV=1
WDR33_MOUSE	pre-mRNA 3' end processing protein WDR33 OS=Mus musculus GN=Wdr33 PE=1 SV=1
WDR89_MOUSE	WD repeat-containing protein 89 OS=Mus musculus GN=Wdr89 PE=2 SV=1
WFC6B_MOUSE	WAP four-disulfide core domain protein 6B OS=Mus musculus GN=Wfdc6b PE=2 SV=1
WIZ_MOUSE	Protein Wiz OS=Mus musculus GN=Wiz PE=1 SV=2
WRIP1_MOUSE	ATPase WRNIP1 OS=Mus musculus GN=Wrnip1 PE=1 SV=2
WSB1_MOUSE	WD repeat and SOCS box-containing protein 1 OS=Mus musculus GN=Wsb1 PE=1 SV=1
XKR7_MOUSE	XK-related protein 7 OS=Mus musculus GN=Xkr7 PE=2 SV=1
XPA_MOUSE	DNA repair protein complementing XP-A cells homolog OS=Mus musculus GN=Xpa PE=1 SV=2
XPO6_MOUSE	Exportin-6 OS=Mus musculus GN=Xpo6 PE=1 SV=2
XRN1_MOUSE	5'-3' exoribonuclease 1 OS=Mus musculus GN=Xrn1 PE=1 SV=1
XRRA1_MOUSE	X-ray radiation resistance-associated protein 1 OS=Mus musculus GN=Xrra1 PE=2 SV=1
YKT6_MOUSE	Synaptobrevin homolog YKT6 OS=Mus musculus GN=Ykt6 PE=1 SV=1
Z518A_MOUSE	Zinc finger protein 518A OS=Mus musculus GN=Znf518a PE=2 SV=1
ZBTB5_MOUSE	Zinc finger and BTB domain-containing protein 5 OS=Mus musculus GN=Zbtb5 PE=2 SV=1
ZC12C_MOUSE	Probable ribonuclease ZC3H12C OS=Mus musculus GN=Zc3h12c PE=1 SV=2
ZDHC6_MOUSE	Palmitoyltransferase ZDHHC6 OS=Mus musculus GN=Zdhhc6 PE=2 SV=1
ZEB2_MOUSE	Zinc finger E-box-binding homeobox 2 OS=Mus musculus GN=Zeb2 PE=1 SV=2
ZEP2_MOUSE	Transcription factor HIVEP2 OS=Mus musculus GN=Hivep2 PE=1 SV=1
ZFP59_MOUSE	Zinc finger protein 59 OS=Mus musculus GN=Zfp59 PE=2 SV=2
ZMY10_MOUSE	Zinc finger MYND domain-containing protein 10 OS=Mus musculus GN=Zmynd10 PE=1 SV=2
ZN148_MOUSE	Zinc finger protein 148 OS=Mus musculus GN=Znf148 PE=1 SV=2
ZN335_MOUSE	Zinc finger protein 335 OS=Mus musculus GN=Znf335 PE=1 SV=1
ZN394_MOUSE	Zinc finger protein 394 OS=Mus musculus GN=Znf394 PE=2 SV=3
ZN423_MOUSE	Zinc finger protein 423 OS=Mus musculus GN=Znf423 PE=1 SV=2
ZN516_MOUSE	Zinc finger protein 516 OS=Mus musculus GN=Znf516 PE=1 SV=1
ZN639_MOUSE	Zinc finger protein 639 OS=Mus musculus GN=Znf639 PE=1 SV=1
ZN691_MOUSE	Zinc finger protein 691 OS=Mus musculus GN=Znf691 PE=2 SV=1
ZN704_MOUSE	Zinc finger protein 704 OS=Mus musculus GN=Znf704 PE=1 SV=1
ZN750_MOUSE	Zinc finger protein 750 OS=Mus musculus GN=Znf750 PE=2 SV=1
ZN770_MOUSE	Zinc finger protein 770 OS=Mus musculus GN=Znf770 PE=2 SV=1
ZN830_MOUSE	Zinc finger protein 830 OS=Mus musculus GN=Znf830 PE=1 SV=1
ZNRF3_MOUSE	E3 ubiquitin-protein ligase ZNRF3 OS=Mus musculus GN=Znrf3 PE=1 SV=1
ZNT1_MOUSE	Zinc transporter 1 OS=Mus musculus GN=Slc30a1 PE=1 SV=1
ZNT9_MOUSE	Zinc transporter 9 OS=Mus musculus GN=Slc30a9 PE=1 SV=2
ZPI_MOUSE	Protein Z-dependent protease inhibitor OS=Mus musculus GN=Serpina10 PE=1 SV=1
ZSWM6_MOUSE	Zinc finger SWIM domain-containing protein 6 OS=Mus musculus GN=Zswim6 PE=1 SV=3
ZSWM8_MOUSE	Zinc finger SWIM domain-containing protein 8 OS=Mus musculus GN=Zswim8 PE=1 SV=1
ZYX_MOUSE	Zyxin OS=Mus musculus GN=Zyx PE=1 SV=2
MIF_MOUSE	Macrophage migration inhibitory factor OS=Mus musculus GN=Mif PE=1 SV=2
GPDM_MOUSE	Glycerol-3-phosphate dehydrogenase, mitochondrial OS=Mus musculus GN=Gpd2 PE=1 SV=2
MYLK_MOUSE	Myosin light chain kinase, smooth muscle OS=Mus musculus GN=Mylk PE=1 SV=3
PDXK_MOUSE	Pyridoxal kinase OS=Mus musculus GN=Pdxk PE=1 SV=1
PSB7_MOUSE	Proteasome subunit beta type-7 OS=Mus musculus GN=Psmb7 PE=1 SV=1
PFKAP_MOUSE	ATP-dependent 6-phosphofructokinase, platelet type OS=Mus musculus GN=Pfkp PE=1 SV=1
TCTP_MOUSE	Translationally-controlled tumor protein OS=Mus musculus GN=Tpt1 PE=1 SV=1
DYH17_MOUSE	Dynein heavy chain 17, axonemal OS=Mus musculus GN=Dnah17 PE=1 SV=2
CLMN_MOUSE	Calmin OS=Mus musculus GN=Clmn PE=1 SV=2
CFA58_MOUSE	Cilia- and flagella-associated protein 58 OS=Mus musculus GN=Cfap58 PE=2 SV=1
BPI_MOUSE	Bactericidal permeability-increasing protein OS=Mus musculus GN=Bpi PE=1 SV=1
CCD63_MOUSE	Coiled-coil domain-containing protein 63 OS=Mus musculus GN=Ccdc63 PE=2 SV=2
SUCA_MOUSE	Succinyl-CoA ligase [ADP/GDP-forming] subunit alpha, mitochondrial OS=Mus musculus GN=Suclg1 PE=1 SV=4
MIME_MOUSE	Mimecan OS=Mus musculus GN=Ogn PE=1 SV=1
RRAGA_MOUSE	Ras-related GTP-binding protein A OS=Mus musculus GN=Rraga PE=1 SV=1
ZP3R_MOUSE	Zona pellucida sperm-binding protein 3 receptor OS=Mus musculus GN=Zp3r PE=1 SV=1
A1AT1_MOUSE	Alpha-1-antitrypsin 1-1 OS=Mus musculus GN=Serpina1a PE=1 SV=4
RNLS_MOUSE	Renalase OS=Mus musculus GN=Rnls PE=1 SV=2
CC113_MOUSE	Coiled-coil domain-containing protein 113 OS=Mus musculus GN=Ccdc113 PE=2 SV=1
HSPB9_MOUSE	Heat shock protein beta-9 OS=Mus musculus GN=Hspb9 PE=2 SV=1
CISY_MOUSE	Citrate synthase, mitochondrial OS=Mus musculus GN=Cs PE=1 SV=1
ACRBP_MOUSE	Acrosin-binding protein OS=Mus musculus GN=Acrbp PE=1 SV=1
CRIS2_MOUSE	Cysteine-rich secretory protein 2 OS=Mus musculus GN=Crisp2 PE=1 SV=1
RAP1B_MOUSE	Ras-related protein Rap-1b OS=Mus musculus GN=Rap1b PE=1 SV=2
SPT33_MOUSE	Spermatogenesis-associated protein 33 OS=Mus musculus GN=Spata33 PE=1 SV=1
CUTC_MOUSE	Copper homeostasis protein cutC homolog OS=Mus musculus GN=Cutc PE=1 SV=1
ALDR_MOUSE	Aldose reductase OS=Mus musculus GN=Akr1b1 PE=1 SV=3
MA2B2_MOUSE	Epididymis-specific alpha-mannosidase OS=Mus musculus GN=Man2b2 PE=1 SV=2
AMPL_MOUSE	Cytosol aminopeptidase OS=Mus musculus GN=Lap3 PE=1 SV=3
ZPBP2_MOUSE	Zona pellucida-binding protein 2 OS=Mus musculus GN=Zpbp2 PE=1 SV=2
SYPL1_MOUSE	Synaptophysin-like protein 1 OS=Mus musculus GN=Sypl1 PE=1 SV=2
MYL6_MOUSE	Myosin light polypeptide 6 OS=Mus musculus GN=Myl6 PE=1 SV=3
ACACA_MOUSE	Acetyl-CoA carboxylase 1 OS=Mus musculus GN=Acaca PE=1 SV=1
CRIP2_MOUSE	Cysteine-rich protein 2 OS=Mus musculus GN=Crip2 PE=1 SV=1
DNJ5B_MOUSE	DnaJ homolog subfamily C member 5B OS=Mus musculus GN=Dnajc5b PE=1 SV=1
RD23B_MOUSE	UV excision repair protein RAD23 homolog B OS=Mus musculus GN=Rad23b PE=1 SV=2
PP4R1_MOUSE	Serine/threonine-protein phosphatase 4 regulatory subunit 1 OS=Mus musculus GN=Ppp4r1 PE=1 SV=2
CBPA5_MOUSE	Carboxypeptidase A5 OS=Mus musculus GN=Cpa5 PE=2 SV=1
CHIP_MOUSE	STIP1 homology and U box-containing protein 1 OS=Mus musculus GN=Stub1 PE=1 SV=1
LYZL6_MOUSE	Lysozyme-like protein 6 OS=Mus musculus GN=Lyzl6 PE=1 SV=1
UCHL1_MOUSE	Ubiquitin carboxyl-terminal hydrolase isozyme L1 OS=Mus musculus GN=Uchl1 PE=1 SV=1
FA49B_MOUSE	Protein FAM49B OS=Mus musculus GN=Fam49b PE=1 SV=1
MSRA_MOUSE	Mitochondrial peptide methionine sulfoxide reductase OS=Mus musculus GN=Msra PE=1 SV=1
GLCTK_MOUSE	Glycerate kinase OS=Mus musculus GN=Glyctk PE=1 SV=1
NIF3L_MOUSE	NIF3-like protein 1 OS=Mus musculus GN=Nif3l1 PE=1 SV=4
KPRA_MOUSE	Phosphoribosyl pyrophosphate synthase-associated protein 1 OS=Mus musculus GN=Prpsap1 PE=1 SV=1
DHB8_MOUSE	Estradiol 17-beta-dehydrogenase 8 OS=Mus musculus GN=Hsd17b8 PE=1 SV=2
PPCE_MOUSE	Prolyl endopeptidase OS=Mus musculus GN=Prep PE=1 SV=1
AOC3_MOUSE	Membrane primary amine oxidase OS=Mus musculus GN=Aoc3 PE=1 SV=3
NALD2_MOUSE	N-acetylated-alpha-linked acidic dipeptidase 2 OS=Mus musculus GN=Naalad2 PE=1 SV=2
ATP5S_MOUSE	ATP synthase subunit s, mitochondrial OS=Mus musculus GN=Atp5s PE=1 SV=1
DCNL1_MOUSE	DCN1-like protein 1 OS=Mus musculus GN=Dcun1d1 PE=1 SV=1
CUL3_MOUSE	Cullin-3 OS=Mus musculus GN=Cul3 PE=1 SV=1
ECM29_MOUSE	Proteasome-associated protein ECM29 homolog OS=Mus musculus GN=Ecm29 PE=1 SV=3
UBQL4_MOUSE	Ubiquilin-4 OS=Mus musculus GN=Ubqln4 PE=1 SV=1
STX12_MOUSE	Syntaxin-12 OS=Mus musculus GN=Stx12 PE=1 SV=1
KAD7_MOUSE	Adenylate kinase 7 OS=Mus musculus GN=Ak7 PE=1 SV=1
DLRB2_MOUSE	Dynein light chain roadblock-type 2 OS=Mus musculus GN=Dynlrb2 PE=1 SV=1
TPD53_MOUSE	Tumor protein D53 OS=Mus musculus GN=Tpd52l1 PE=1 SV=1
DYL1_MOUSE	Dynein light chain 1, cytoplasmic OS=Mus musculus GN=Dynll1 PE=1 SV=1
CTSR2_MOUSE	Cation channel sperm-associated protein 2 OS=Mus musculus GN=Catsper2 PE=1 SV=2
TRFE_MOUSE	Serotransferrin OS=Mus musculus GN=Tf PE=1 SV=1
ARPC3_MOUSE	Actin-related protein 2/3 complex subunit 3 OS=Mus musculus GN=Arpc3 PE=1 SV=3
ARF3_MOUSE	ADP-ribosylation factor 3 OS=Mus musculus GN=Arf3 PE=2 SV=2
IF1AX_MOUSE	Eukaryotic translation initiation factor 1A, X-chromosomal OS=Mus musculus GN=Eif1ax PE=2 SV=3
L2HDH_MOUSE	L-2-hydroxyglutarate dehydrogenase, mitochondrial OS=Mus musculus GN=L2hgdh PE=1 SV=1
FHIT_MOUSE	Bis(5'-adenosyl)-triphosphatase OS=Mus musculus GN=Fhit PE=1 SV=3
NDUA7_MOUSE	NADH dehydrogenase [ubiquinone] 1 alpha subcomplex subunit 7 OS=Mus musculus GN=Ndufa7 PE=1 SV=3
MIMIT_MOUSE	Mimitin, mitochondrial OS=Mus musculus GN=Ndufaf2 PE=1 SV=1
B2L15_MOUSE	Bcl-2-like protein 15 OS=Mus musculus GN=Bcl2l15 PE=2 SV=2
PPE1_MOUSE	Serine/threonine-protein phosphatase with EF-hands 1 OS=Mus musculus GN=Ppef1 PE=2 SV=2
PRS4_MOUSE	26S protease regulatory subunit 4 OS=Mus musculus GN=Psmc1 PE=1 SV=1
PSB4_MOUSE	Proteasome subunit beta type-4 OS=Mus musculus GN=Psmb4 PE=1 SV=1
ZDBF2_MOUSE	DBF4-type zinc finger-containing protein 2 homolog OS=Mus musculus GN=Zdbf2 PE=2 SV=1
GLRX1_MOUSE	Glutaredoxin-1 OS=Mus musculus GN=Glrx PE=1 SV=3
IZUM4_MOUSE	Izumo sperm-egg fusion protein 4 OS=Mus musculus GN=Izumo4 PE=1 SV=1
LEG1_MOUSE	Galectin-1 OS=Mus musculus GN=Lgals1 PE=1 SV=3
SPAG6_MOUSE	Sperm-associated antigen 6 OS=Mus musculus GN=Spag6 PE=1 SV=1
ROP1_MOUSE	Ropporin-1 OS=Mus musculus GN=Ropn1 PE=1 SV=1
H2B2E_MOUSE	Histone H2B type 2-E OS=Mus musculus GN=Hist2h2be PE=1 SV=3
VTDB_MOUSE	Vitamin D-binding protein OS=Mus musculus GN=Gc PE=1 SV=2
GPX5_MOUSE	Epididymal secretory glutathione peroxidase OS=Mus musculus GN=Gpx5 PE=2 SV=3
MMEL1_MOUSE	Membrane metallo-endopeptidase-like 1 OS=Mus musculus GN=Mmel1 PE=1 SV=1
FABP9_MOUSE	Fatty acid-binding protein 9 OS=Mus musculus GN=Fabp9 PE=1 SV=2
PLPL9_MOUSE	85/88 kDa calcium-independent phospholipase A2 OS=Mus musculus GN=Pla2g6 PE=1 SV=3
SH3L3_MOUSE	SH3 domain-binding glutamic acid-rich-like protein 3 OS=Mus musculus GN=Sh3bgrl3 PE=1 SV=1
TIM13_MOUSE	Mitochondrial import inner membrane translocase subunit Tim13 OS=Mus musculus GN=Timm13 PE=1 SV=1
PSD12_MOUSE	26S proteasome non-ATPase regulatory subunit 12 OS=Mus musculus GN=Psmd12 PE=1 SV=4
OXR1_MOUSE	Oxidation resistance protein 1 OS=Mus musculus GN=Oxr1 PE=1 SV=3
NDKA_MOUSE	Nucleoside diphosphate kinase A OS=Mus musculus GN=Nme1 PE=1 SV=1
LSM2_MOUSE	U6 snRNA-associated Sm-like protein LSm2 OS=Mus musculus GN=Lsm2 PE=1 SV=1
DNPEP_MOUSE	Aspartyl aminopeptidase OS=Mus musculus GN=Dnpep PE=1 SV=2
MACD1_MOUSE	O-acetyl-ADP-ribose deacetylase MACROD1 OS=Mus musculus GN=Macrod1 PE=1 SV=2
GRPL2_MOUSE	GLIPR1-like protein 2 OS=Mus musculus GN=Glipr1l2 PE=1 SV=1
ACYP1_MOUSE	Acylphosphatase-1 OS=Mus musculus GN=Acyp1 PE=1 SV=2
DBIL5_MOUSE	Diazepam-binding inhibitor-like 5 OS=Mus musculus GN=Dbil5 PE=1 SV=1
PGAM2_MOUSE	Phosphoglycerate mutase 2 OS=Mus musculus GN=Pgam2 PE=1 SV=3
SPRE_MOUSE	Sepiapterin reductase OS=Mus musculus GN=Spr PE=1 SV=1
ADGB_MOUSE	Androglobin OS=Mus musculus GN=Adgb PE=1 SV=1
PYGB_MOUSE	Glycogen phosphorylase, brain form OS=Mus musculus GN=Pygb PE=1 SV=3
PRS8_MOUSE	26S protease regulatory subunit 8 OS=Mus musculus GN=Psmc5 PE=1 SV=1
WNK1_MOUSE	Serine/threonine-protein kinase WNK1 OS=Mus musculus GN=Wnk1 PE=1 SV=2
UBE4A_MOUSE	Ubiquitin conjugation factor E4 A OS=Mus musculus GN=Ube4a PE=1 SV=1
RAB4B_MOUSE	Ras-related protein Rab-4B OS=Mus musculus GN=Rab4b PE=1 SV=2
TCPW_MOUSE	T-complex protein 1 subunit zeta-2 OS=Mus musculus GN=Cct6b PE=1 SV=4
TBB2A_MOUSE	Tubulin beta-2A chain OS=Mus musculus GN=Tubb2a PE=1 SV=1
G6PD2_MOUSE	Glucose-6-phosphate 1-dehydrogenase 2 OS=Mus musculus GN=G6pd2 PE=1 SV=3
TCPG_MOUSE	T-complex protein 1 subunit gamma OS=Mus musculus GN=Cct3 PE=1 SV=1
IDHG2_MOUSE	Probable isocitrate dehydrogenase [NAD] gamma 2, mitochondrial OS=Mus musculus PE=2 SV=1
CYC_MOUSE	Cytochrome c, somatic OS=Mus musculus GN=Cycs PE=1 SV=2
PTPA_MOUSE	Serine/threonine-protein phosphatase 2A activator OS=Mus musculus GN=Ppp2r4 PE=1 SV=1
PRS7_MOUSE	26S protease regulatory subunit 7 OS=Mus musculus GN=Psmc2 PE=1 SV=5
SP17_MOUSE	Sperm surface protein Sp17 OS=Mus musculus GN=Spa17 PE=1 SV=1
COX41_MOUSE	Cytochrome c oxidase subunit 4 isoform 1, mitochondrial OS=Mus musculus GN=Cox4i1 PE=1 SV=2
NAGA_MOUSE	Putative N-acetylglucosamine-6-phosphate deacetylase OS=Mus musculus GN=Amdhd2 PE=1 SV=1
SPB6_MOUSE	Serpin B6 OS=Mus musculus GN=Serpinb6 PE=1 SV=1
SACA1_MOUSE	Sperm acrosome membrane-associated protein 1 OS=Mus musculus GN=Spaca1 PE=1 SV=1
DUS3_MOUSE	Dual specificity protein phosphatase 3 OS=Mus musculus GN=Dusp3 PE=1 SV=1
GDPD4_MOUSE	Glycerophosphodiester phosphodiesterase domain-containing protein 4 OS=Mus musculus GN=Gdpd4 PE=2 SV=1
KC1A_MOUSE	Casein kinase I isoform alpha OS=Mus musculus GN=Csnk1a1 PE=1 SV=2
QCR9_MOUSE	Cytochrome b-c1 complex subunit 9 OS=Mus musculus GN=Uqcr10 PE=1 SV=1
IZUM1_MOUSE	Izumo sperm-egg fusion protein 1 OS=Mus musculus GN=Izumo1 PE=1 SV=1
PRS39_MOUSE	Inactive serine protease 39 OS=Mus musculus GN=Prss39 PE=2 SV=1
EFR3A_MOUSE	Protein EFR3 homolog A OS=Mus musculus GN=Efr3a PE=1 SV=1
CC151_MOUSE	Coiled-coil domain-containing protein 151 OS=Mus musculus GN=Ccdc151 PE=2 SV=1
TXND3_MOUSE	Thioredoxin domain-containing protein 3 OS=Mus musculus GN=Nme8 PE=2 SV=1
PSD11_MOUSE	26S proteasome non-ATPase regulatory subunit 11 OS=Mus musculus GN=Psmd11 PE=1 SV=3
UGPA_MOUSE	UTP--glucose-1-phosphate uridylyltransferase OS=Mus musculus GN=Ugp2 PE=1 SV=3
FRIH_MOUSE	Ferritin heavy chain OS=Mus musculus GN=Fth1 PE=1 SV=2
CISD1_MOUSE	CDGSH iron-sulfur domain-containing protein 1 OS=Mus musculus GN=Cisd1 PE=1 SV=1
ITA1_MOUSE	Integrin alpha-1 OS=Mus musculus GN=Itga1 PE=1 SV=2
CNN1_MOUSE	Calponin-1 OS=Mus musculus GN=Cnn1 PE=1 SV=1
TEX40_MOUSE	Testis-expressed sequence 40 protein OS=Mus musculus GN=Tex40 PE=2 SV=1
PGAM1_MOUSE	Phosphoglycerate mutase 1 OS=Mus musculus GN=Pgam1 PE=1 SV=3
PSD13_MOUSE	26S proteasome non-ATPase regulatory subunit 13 OS=Mus musculus GN=Psmd13 PE=1 SV=1
CSK22_MOUSE	Casein kinase II subunit alpha' OS=Mus musculus GN=Csnk2a2 PE=1 SV=1
RD23A_MOUSE	UV excision repair protein RAD23 homolog A OS=Mus musculus GN=Rad23a PE=1 SV=2
TTC25_MOUSE	Tetratricopeptide repeat protein 25 OS=Mus musculus GN=Ttc25 PE=1 SV=3
ARK72_MOUSE	Aflatoxin B1 aldehyde reductase member 2 OS=Mus musculus GN=Akr7a2 PE=1 SV=3
ASPM_MOUSE	Abnormal spindle-like microcephaly-associated protein homolog OS=Mus musculus GN=Aspm PE=2 SV=2
CELR1_MOUSE	Cadherin EGF LAG seven-pass G-type receptor 1 OS=Mus musculus GN=Celsr1 PE=1 SV=3
MINT_MOUSE	Msx2-interacting protein OS=Mus musculus GN=Spen PE=1 SV=2
MYO5A_MOUSE	Unconventional myosin-Va OS=Mus musculus GN=Myo5a PE=1 SV=2
GLMN_MOUSE	Glomulin OS=Mus musculus GN=Glmn PE=1 SV=1
ODPX_MOUSE	Pyruvate dehydrogenase protein X component, mitochondrial OS=Mus musculus GN=Pdhx PE=1 SV=1
CB061_MOUSE	Uncharacterized protein C2orf61 homolog OS=Mus musculus PE=2 SV=1
CC183_MOUSE	Coiled-coil domain-containing protein 183 OS=Mus musculus GN=Ccdc183 PE=2 SV=1
UBP47_MOUSE	Ubiquitin carboxyl-terminal hydrolase 47 OS=Mus musculus GN=Usp47 PE=1 SV=2
CUL1_MOUSE	Cullin-1 OS=Mus musculus GN=Cul1 PE=1 SV=1
RFWD3_MOUSE	E3 ubiquitin-protein ligase RFWD3 OS=Mus musculus GN=Rfwd3 PE=2 SV=1
PLCZ1_MOUSE	1-phosphatidylinositol 4,5-bisphosphate phosphodiesterase zeta-1 OS=Mus musculus GN=Plcz1 PE=1 SV=1
NO66_MOUSE	Bifunctional lysine-specific demethylase and histidyl-hydroxylase NO66 OS=Mus musculus GN=No66 PE=1 SV=2
AL3B1_MOUSE	Aldehyde dehydrogenase family 3 member B1 OS=Mus musculus GN=Aldh3b1 PE=1 SV=1
RPH3L_MOUSE	Rab effector Noc2 OS=Mus musculus GN=Rph3al PE=1 SV=1
SPRY4_MOUSE	SPRY domain-containing protein 4 OS=Mus musculus GN=Spryd4 PE=1 SV=1
PRS6B_MOUSE	26S protease regulatory subunit 6B OS=Mus musculus GN=Psmc4 PE=1 SV=2
OPLA_MOUSE	5-oxoprolinase OS=Mus musculus GN=Oplah PE=1 SV=1
TEST_MOUSE	Testisin OS=Mus musculus GN=Prss21 PE=1 SV=2
DNAI1_MOUSE	Dynein intermediate chain 1, axonemal OS=Mus musculus GN=Dnai1 PE=1 SV=1
TM38B_MOUSE	Trimeric intracellular cation channel type B OS=Mus musculus GN=Tmem38b PE=1 SV=1
PRS55_MOUSE	Serine protease 55 OS=Mus musculus GN=Prss55 PE=2 SV=1
PLBL2_MOUSE	Putative phospholipase B-like 2 OS=Mus musculus GN=Plbd2 PE=1 SV=2
HINT1_MOUSE	Histidine triad nucleotide-binding protein 1 OS=Mus musculus GN=Hint1 PE=1 SV=3
CSK21_MOUSE	Casein kinase II subunit alpha OS=Mus musculus GN=Csnk2a1 PE=1 SV=2
UBAC1_MOUSE	Ubiquitin-associated domain-containing protein 1 OS=Mus musculus GN=Ubac1 PE=1 SV=2
IDLC_MOUSE	Axonemal dynein light intermediate polypeptide 1 OS=Mus musculus GN=Dnali1 PE=1 SV=1
VATG1_MOUSE	V-type proton ATPase subunit G 1 OS=Mus musculus GN=Atp6v1g1 PE=1 SV=3
TRNT1_MOUSE	CCA tRNA nucleotidyltransferase 1, mitochondrial OS=Mus musculus GN=Trnt1 PE=1 SV=1
STIP1_MOUSE	Stress-induced-phosphoprotein 1 OS=Mus musculus GN=Stip1 PE=1 SV=1
TAGL_MOUSE	Transgelin OS=Mus musculus GN=Tagln PE=1 SV=3
UBFD1_MOUSE	Ubiquitin domain-containing protein UBFD1 OS=Mus musculus GN=Ubfd1 PE=1 SV=2
CASC1_MOUSE	Protein CASC1 OS=Mus musculus GN=Casc1 PE=1 SV=1
STK33_MOUSE	Serine/threonine-protein kinase 33 OS=Mus musculus GN=Stk33 PE=1 SV=2
MOT2_MOUSE	Monocarboxylate transporter 2 OS=Mus musculus GN=Slc16a7 PE=1 SV=1
NSF1C_MOUSE	NSFL1 cofactor p47 OS=Mus musculus GN=Nsfl1c PE=1 SV=1
ARSA_MOUSE	Arylsulfatase A OS=Mus musculus GN=Arsa PE=1 SV=2
DYH2_MOUSE	Dynein heavy chain 2, axonemal OS=Mus musculus GN=Dnah2 PE=1 SV=1
EQTN_MOUSE	Equatorin OS=Mus musculus GN=Eqtn PE=1 SV=2
PEBP4_MOUSE	Phosphatidylethanolamine-binding protein 4 OS=Mus musculus GN=Pebp4 PE=1 SV=1
WWP2_MOUSE	NEDD4-like E3 ubiquitin-protein ligase WWP2 OS=Mus musculus GN=Wwp2 PE=1 SV=1
ACTN1_MOUSE	Alpha-actinin-1 OS=Mus musculus GN=Actn1 PE=1 SV=1
INSL6_MOUSE	Insulin-like peptide INSL6 OS=Mus musculus GN=Insl6 PE=2 SV=1
TBB3_MOUSE	Tubulin beta-3 chain OS=Mus musculus GN=Tubb3 PE=1 SV=1
BOLA1_MOUSE	BolA-like protein 1 OS=Mus musculus GN=Bola1 PE=1 SV=1
TTHY_MOUSE	Transthyretin OS=Mus musculus GN=Ttr PE=1 SV=1
PHP14_MOUSE	14 kDa phosphohistidine phosphatase OS=Mus musculus GN=Phpt1 PE=1 SV=1
HDHD1_MOUSE	Pseudouridine-5'-phosphatase OS=Mus musculus GN=Hdhd1 PE=1 SV=1
ARMC3_MOUSE	Armadillo repeat-containing protein 3 OS=Mus musculus GN=Armc3 PE=1 SV=1
EST1C_MOUSE	Carboxylesterase 1C OS=Mus musculus GN=Ces1c PE=1 SV=4
RET1_MOUSE	Retinol-binding protein 1 OS=Mus musculus GN=Rbp1 PE=1 SV=2
DYLT1_MOUSE	Dynein light chain Tctex-type 1 OS=Mus musculus GN=Dynlt1 PE=1 SV=1
PYRG1_MOUSE	CTP synthase 1 OS=Mus musculus GN=Ctps1 PE=1 SV=2
RL35A_MOUSE	60S ribosomal protein L35a OS=Mus musculus GN=Rpl35a PE=1 SV=2
LGUL_MOUSE	Lactoylglutathione lyase OS=Mus musculus GN=Glo1 PE=1 SV=3
DGUOK_MOUSE	Deoxyguanosine kinase, mitochondrial OS=Mus musculus GN=Dguok PE=1 SV=3
RPIA_MOUSE	Ribose-5-phosphate isomerase OS=Mus musculus GN=Rpia PE=1 SV=2
TLN2_MOUSE	Talin-2 OS=Mus musculus GN=Tln2 PE=1 SV=3
UBA6_MOUSE	Ubiquitin-like modifier-activating enzyme 6 OS=Mus musculus GN=Uba6 PE=1 SV=1
AL1A2_MOUSE	Retinal dehydrogenase 2 OS=Mus musculus GN=Aldh1a2 PE=1 SV=2
PRS10_MOUSE	26S protease regulatory subunit 10B OS=Mus musculus GN=Psmc6 PE=1 SV=1
D19L1_MOUSE	Probable C-mannosyltransferase DPY19L1 OS=Mus musculus GN=Dpy19l1 PE=1 SV=1
KAD1_MOUSE	Adenylate kinase isoenzyme 1 OS=Mus musculus GN=Ak1 PE=1 SV=1
S13A5_MOUSE	Solute carrier family 13 member 5 OS=Mus musculus GN=Slc13a5 PE=2 SV=1
NAR3_MOUSE	Ecto-ADP-ribosyltransferase 3 OS=Mus musculus GN=Art3 PE=1 SV=2
RS21_MOUSE	40S ribosomal protein S21 OS=Mus musculus GN=Rps21 PE=1 SV=1
PCP_MOUSE	Lysosomal Pro-X carboxypeptidase OS=Mus musculus GN=Prcp PE=1 SV=2
HDHD2_MOUSE	Haloacid dehalogenase-like hydrolase domain-containing protein 2 OS=Mus musculus GN=Hdhd2 PE=1 SV=2
VAMP3_MOUSE	Vesicle-associated membrane protein 3 OS=Mus musculus GN=Vamp3 PE=1 SV=1
PSMD2_MOUSE	26S proteasome non-ATPase regulatory subunit 2 OS=Mus musculus GN=Psmd2 PE=1 SV=1
CCD42_MOUSE	Coiled-coil domain-containing protein 42A OS=Mus musculus GN=Ccdc42 PE=2 SV=2
CIB1_MOUSE	Calcium and integrin-binding protein 1 OS=Mus musculus GN=Cib1 PE=1 SV=3
MIEAP_MOUSE	Mitochondria-eating protein OS=Mus musculus GN=Spata18 PE=1 SV=2
K1468_MOUSE	LisH domain and HEAT repeat-containing protein KIAA1468 OS=Mus musculus GN=Kiaa1468 PE=1 SV=1
TBB5_MOUSE	Tubulin beta-5 chain OS=Mus musculus GN=Tubb5 PE=1 SV=1
GNPI1_MOUSE	Glucosamine-6-phosphate isomerase 1 OS=Mus musculus GN=Gnpda1 PE=1 SV=3
ARF6_MOUSE	ADP-ribosylation factor 6 OS=Mus musculus GN=Arf6 PE=1 SV=2
AP4A_MOUSE	Bis(5'-nucleosyl)-tetraphosphatase [asymmetrical] OS=Mus musculus GN=Nudt2 PE=1 SV=3
PDPR_MOUSE	Pyruvate dehydrogenase phosphatase regulatory subunit, mitochondrial OS=Mus musculus GN=Pdpr PE=1 SV=1
OXLA_MOUSE	L-amino-acid oxidase OS=Mus musculus GN=Il4i1 PE=1 SV=1
ABHDA_MOUSE	Mycophenolic acid acyl-glucuronide esterase, mitochondrial OS=Mus musculus GN=Abhd10 PE=1 SV=1
LRGUK_MOUSE	Leucine-rich repeat and guanylate kinase domain-containing protein OS=Mus musculus GN=Lrguk PE=2 SV=1
CCD27_MOUSE	Coiled-coil domain-containing protein 27 OS=Mus musculus GN=Ccdc27 PE=2 SV=1
NGLY1_MOUSE	Peptide-N(4)-(N-acetyl-beta-glucosaminyl)asparagine amidase OS=Mus musculus GN=Ngly1 PE=1 SV=2
B4GT7_MOUSE	Beta-1,4-galactosyltransferase 7 OS=Mus musculus GN=B4galt7 PE=2 SV=1
PP4C_MOUSE	Serine/threonine-protein phosphatase 4 catalytic subunit OS=Mus musculus GN=Ppp4c PE=1 SV=2
TMM56_MOUSE	Transmembrane protein 56 OS=Mus musculus GN=Tmem56 PE=2 SV=1
PDE8A_MOUSE	High affinity cAMP-specific and IBMX-insensitive 3',5'-cyclic phosphodiesterase 8A OS=Mus musculus GN=Pde8a PE=1 SV=1
CC114_MOUSE	Coiled-coil domain-containing protein 114 OS=Mus musculus GN=Ccdc114 PE=2 SV=1
CETN1_MOUSE	Centrin-1 OS=Mus musculus GN=Cetn1 PE=1 SV=1
CG062_MOUSE	Uncharacterized protein C7orf62 homolog OS=Mus musculus PE=2 SV=1
PP1RB_MOUSE	Protein phosphatase 1 regulatory subunit 11 OS=Mus musculus GN=Ppp1r11 PE=1 SV=1
QCR7_MOUSE	Cytochrome b-c1 complex subunit 7 OS=Mus musculus GN=Uqcrb PE=1 SV=3
A1AT5_MOUSE	Alpha-1-antitrypsin 1-5 OS=Mus musculus GN=Serpina1e PE=1 SV=1
RS10_MOUSE	40S ribosomal protein S10 OS=Mus musculus GN=Rps10 PE=1 SV=1
VATE2_MOUSE	V-type proton ATPase subunit E 2 OS=Mus musculus GN=Atp6v1e2 PE=1 SV=1
NEUL_MOUSE	Neurolysin, mitochondrial OS=Mus musculus GN=Nln PE=1 SV=1
HTAI2_MOUSE	Oxidoreductase HTATIP2 OS=Mus musculus GN=Htatip2 PE=1 SV=3
5NT1B_MOUSE	Cytosolic 5'-nucleotidase 1B OS=Mus musculus GN=Nt5c1b PE=2 SV=2
PP1R7_MOUSE	Protein phosphatase 1 regulatory subunit 7 OS=Mus musculus GN=Ppp1r7 PE=1 SV=2
CTL5_MOUSE	Choline transporter-like protein 5 OS=Mus musculus GN=Slc44a5 PE=2 SV=1
SERPH_MOUSE	Serpin H1 OS=Mus musculus GN=Serpinh1 PE=1 SV=3
ARMT1_MOUSE	Protein-glutamate O-methyltransferase OS=Mus musculus GN=Armt1 PE=1 SV=1
GNPAT_MOUSE	Dihydroxyacetone phosphate acyltransferase OS=Mus musculus GN=Gnpat PE=1 SV=1
MRP9_MOUSE	Multidrug resistance-associated protein 9 OS=Mus musculus GN=Abcc12 PE=2 SV=1
SYK_MOUSE	Lysine--tRNA ligase OS=Mus musculus GN=Kars PE=1 SV=1
PP1G_MOUSE	Serine/threonine-protein phosphatase PP1-gamma catalytic subunit OS=Mus musculus GN=Ppp1cc PE=1 SV=1
NDUA5_MOUSE	NADH dehydrogenase [ubiquinone] 1 alpha subcomplex subunit 5 OS=Mus musculus GN=Ndufa5 PE=1 SV=3
KPRB_MOUSE	Phosphoribosyl pyrophosphate synthase-associated protein 2 OS=Mus musculus GN=Prpsap2 PE=1 SV=1
FAD1_MOUSE	FAD synthase OS=Mus musculus GN=Flad1 PE=1 SV=1
TMCO2_MOUSE	Transmembrane and coiled-coil domain-containing protein 2 OS=Mus musculus GN=Tmco2 PE=1 SV=1
GSH1_MOUSE	Glutamate--cysteine ligase catalytic subunit OS=Mus musculus GN=Gclc PE=1 SV=4
TXIP1_MOUSE	Translin-associated factor X-interacting protein 1 OS=Mus musculus GN=Tsnaxip1 PE=1 SV=2
EFCB2_MOUSE	EF-hand calcium-binding domain-containing protein 2 OS=Mus musculus GN=Efcab2 PE=1 SV=1
TSSK1_MOUSE	Testis-specific serine/threonine-protein kinase 1 OS=Mus musculus GN=Tssk1b PE=1 SV=2
DKKL1_MOUSE	Dickkopf-like protein 1 OS=Mus musculus GN=Dkkl1 PE=1 SV=2
NSF_MOUSE	Vesicle-fusing ATPase OS=Mus musculus GN=Nsf PE=1 SV=2
PROF2_MOUSE	Profilin-2 OS=Mus musculus GN=Pfn2 PE=1 SV=3
MUG1_MOUSE	Murinoglobulin-1 OS=Mus musculus GN=Mug1 PE=1 SV=3
PHOP1_MOUSE	Phosphoethanolamine/phosphocholine phosphatase OS=Mus musculus GN=Phospho1 PE=1 SV=1
BSPRY_MOUSE	B box and SPRY domain-containing protein OS=Mus musculus GN=Bspry PE=1 SV=1
NAGK_MOUSE	N-acetyl-D-glucosamine kinase OS=Mus musculus GN=Nagk PE=1 SV=3
CCD58_MOUSE	Coiled-coil domain-containing protein 58 OS=Mus musculus GN=Ccdc58 PE=1 SV=1
IGB1B_MOUSE	Immunoglobulin-binding protein 1b OS=Mus musculus GN=Igbp1b PE=1 SV=1
LAMC1_MOUSE	Laminin subunit gamma-1 OS=Mus musculus GN=Lamc1 PE=1 SV=2
RBBP6_MOUSE	E3 ubiquitin-protein ligase RBBP6 OS=Mus musculus GN=Rbbp6 PE=1 SV=5
OXSM_MOUSE	3-oxoacyl-[acyl-carrier-protein] synthase, mitochondrial OS=Mus musculus GN=Oxsm PE=1 SV=1
CLF2A_MOUSE	CKLF-like MARVEL transmembrane domain-containing protein 2A OS=Mus musculus GN=Cmtm2a PE=2 SV=1
UBX11_MOUSE	UBX domain-containing protein 11 OS=Mus musculus GN=Ubxn11 PE=1 SV=1
NHRF3_MOUSE	Na(+)/H(+) exchange regulatory cofactor NHE-RF3 OS=Mus musculus GN=Pdzk1 PE=1 SV=1
PYGL_MOUSE	Glycogen phosphorylase, liver form OS=Mus musculus GN=Pygl PE=1 SV=4
PFKAM_MOUSE	ATP-dependent 6-phosphofructokinase, muscle type OS=Mus musculus GN=Pfkm PE=1 SV=3
NMES1_MOUSE	Normal mucosa of esophagus-specific gene 1 protein OS=Mus musculus GN=Nmes1 PE=1 SV=1
PPM1B_MOUSE	Protein phosphatase 1B OS=Mus musculus GN=Ppm1b PE=1 SV=1
RS19_MOUSE	40S ribosomal protein S19 OS=Mus musculus GN=Rps19 PE=1 SV=3
ACL7A_MOUSE	Actin-like protein 7A OS=Mus musculus GN=Actl7a PE=1 SV=1
KAD2_MOUSE	Adenylate kinase 2, mitochondrial OS=Mus musculus GN=Ak2 PE=1 SV=5
NU188_MOUSE	Nucleoporin NUP188 homolog OS=Mus musculus GN=Nup188 PE=1 SV=2
GPX6_MOUSE	Glutathione peroxidase 6 OS=Mus musculus GN=Gpx6 PE=2 SV=2
ARL2_MOUSE	ADP-ribosylation factor-like protein 2 OS=Mus musculus GN=Arl2 PE=1 SV=1
SRPK1_MOUSE	SRSF protein kinase 1 OS=Mus musculus GN=Srpk1 PE=1 SV=2
CYC2_MOUSE	Cytochrome c, testis-specific OS=Mus musculus GN=Cyct PE=1 SV=3
CB047_MOUSE	Uncharacterized protein C2orf47 homolog, mitochondrial OS=Mus musculus PE=1 SV=1
PMGE_MOUSE	Bisphosphoglycerate mutase OS=Mus musculus GN=Bpgm PE=1 SV=2
SSBP_MOUSE	Single-stranded DNA-binding protein, mitochondrial OS=Mus musculus GN=Ssbp1 PE=1 SV=1
TI17B_MOUSE	Mitochondrial import inner membrane translocase subunit Tim17-B OS=Mus musculus GN=Timm17b PE=1 SV=1
UBE3A_MOUSE	Ubiquitin-protein ligase E3A OS=Mus musculus GN=Ube3a PE=1 SV=2
SNG4_MOUSE	Synaptogyrin-4 OS=Mus musculus GN=Syngr4 PE=1 SV=2
PLCD4_MOUSE	1-phosphatidylinositol 4,5-bisphosphate phosphodiesterase delta-4 OS=Mus musculus GN=Plcd4 PE=1 SV=2
BIG1_MOUSE	Brefeldin A-inhibited guanine nucleotide-exchange protein 1 OS=Mus musculus GN=Arfgef1 PE=1 SV=1
STOM_MOUSE	Erythrocyte band 7 integral membrane protein OS=Mus musculus GN=Stom PE=1 SV=3
GGT7_MOUSE	Gamma-glutamyltransferase 7 OS=Mus musculus GN=Ggt7 PE=1 SV=2
UB2V2_MOUSE	Ubiquitin-conjugating enzyme E2 variant 2 OS=Mus musculus GN=Ube2v2 PE=1 SV=4
ISC2A_MOUSE	Isochorismatase domain-containing protein 2A, mitochondrial OS=Mus musculus GN=Isoc2a PE=1 SV=1
PGM5_MOUSE	Phosphoglucomutase-like protein 5 OS=Mus musculus GN=Pgm5 PE=1 SV=2
TOM1_MOUSE	Target of Myb protein 1 OS=Mus musculus GN=Tom1 PE=1 SV=1
DOPD_MOUSE	D-dopachrome decarboxylase OS=Mus musculus GN=Ddt PE=1 SV=3
SYNEM_MOUSE	Synemin OS=Mus musculus GN=Synm PE=1 SV=2
CFA69_MOUSE	Cilia- and flagella-associated protein 69 OS=Mus musculus GN=Cfap69 PE=2 SV=1
SH3L1_MOUSE	SH3 domain-binding glutamic acid-rich-like protein OS=Mus musculus GN=Sh3bgrl PE=1 SV=1
F162A_MOUSE	Protein FAM162A OS=Mus musculus GN=Fam162a PE=1 SV=1
MGDP1_MOUSE	Magnesium-dependent phosphatase 1 OS=Mus musculus GN=Mdp1 PE=1 SV=1
FRDA_MOUSE	Frataxin, mitochondrial OS=Mus musculus GN=Fxn PE=1 SV=1
TKFC_MOUSE	Triokinase/FMN cyclase OS=Mus musculus GN=Tkfc PE=1 SV=1
EFCB1_MOUSE	EF-hand calcium-binding domain-containing protein 1 OS=Mus musculus GN=Efcab1 PE=2 SV=1
CTSR4_MOUSE	Cation channel sperm-associated protein 4 OS=Mus musculus GN=Catsper4 PE=1 SV=1
ELOB_MOUSE	Transcription elongation factor B polypeptide 2 OS=Mus musculus GN=Tceb2 PE=1 SV=1
CANB2_MOUSE	Calcineurin subunit B type 2 OS=Mus musculus GN=Ppp3r2 PE=1 SV=3
FIS1_MOUSE	Mitochondrial fission 1 protein OS=Mus musculus GN=Fis1 PE=1 SV=1
ENAH_MOUSE	Protein enabled homolog OS=Mus musculus GN=Enah PE=1 SV=2
IDHC_MOUSE	Isocitrate dehydrogenase [NADP] cytoplasmic OS=Mus musculus GN=Idh1 PE=1 SV=2
A1AT4_MOUSE	Alpha-1-antitrypsin 1-4 OS=Mus musculus GN=Serpina1d PE=1 SV=1
CD109_MOUSE	CD109 antigen OS=Mus musculus GN=Cd109 PE=1 SV=1
XPO7_MOUSE	Exportin-7 OS=Mus musculus GN=Xpo7 PE=1 SV=3
CTSR1_MOUSE	Cation channel sperm-associated protein 1 OS=Mus musculus GN=Catsper1 PE=1 SV=1
PP2BC_MOUSE	Serine/threonine-protein phosphatase 2B catalytic subunit gamma isoform OS=Mus musculus GN=Ppp3cc PE=1 SV=1
CECR5_MOUSE	Cat eye syndrome critical region protein 5 homolog OS=Mus musculus GN=Cecr5 PE=1 SV=1
SPEF2_MOUSE	Sperm flagellar protein 2 OS=Mus musculus GN=Spef2 PE=2 SV=2
INPP_MOUSE	Inositol polyphosphate 1-phosphatase OS=Mus musculus GN=Inpp1 PE=1 SV=2
KLH10_MOUSE	Kelch-like protein 10 OS=Mus musculus GN=Klhl10 PE=1 SV=1
PTPM1_MOUSE	Phosphatidylglycerophosphatase and protein-tyrosine phosphatase 1 OS=Mus musculus GN=Ptpmt1 PE=1 SV=1
SPP2B_MOUSE	Signal peptide peptidase-like 2B OS=Mus musculus GN=Sppl2b PE=1 SV=2
MRO2B_MOUSE	Maestro heat-like repeat-containing protein family member 2B OS=Mus musculus GN=Mroh2b PE=2 SV=2
PRS54_MOUSE	Inactive serine protease 54 OS=Mus musculus GN=Prss54 PE=2 SV=1
FKB1A_MOUSE	Peptidyl-prolyl cis-trans isomerase FKBP1A OS=Mus musculus GN=Fkbp1a PE=1 SV=2
UBL4A_MOUSE	Ubiquitin-like protein 4A OS=Mus musculus GN=Ubl4a PE=1 SV=1
RBP17_MOUSE	Ran-binding protein 17 OS=Mus musculus GN=Ranbp17 PE=1 SV=1
LIPS_MOUSE	Hormone-sensitive lipase OS=Mus musculus GN=Lipe PE=1 SV=2
PRPS1_MOUSE	Ribose-phosphate pyrophosphokinase 1 OS=Mus musculus GN=Prps1 PE=1 SV=4
VAMP2_MOUSE	Vesicle-associated membrane protein 2 OS=Mus musculus GN=Vamp2 PE=1 SV=2
SACA3_MOUSE	Sperm acrosome membrane-associated protein 3 OS=Mus musculus GN=Spaca3 PE=1 SV=2
H2B2B_MOUSE	Histone H2B type 2-B OS=Mus musculus GN=Hist2h2bb PE=1 SV=3
TSSK4_MOUSE	Testis-specific serine/threonine-protein kinase 4 OS=Mus musculus GN=Tssk4 PE=2 SV=1
SATL1_MOUSE	Spermidine/spermine N(1)-acetyltransferase-like protein 1 OS=Mus musculus GN=Satl1 PE=2 SV=2
